# Supplementary material
Source: PubMed Central journal article supplement (PMC5520631)
Supplement: NIHMS879870-supplement-Supporting_Information.pdf [file NIHMS879870-supplement-Supporting_Information.pdf]

## Supporting Information

### **Vitepyrroloids A-D, 2-Cyanopyrrole-containing Labdane Diterpenoid Alkaloids from the Leaves of *Vitex trifolia***

Pan Luo,<sup>†</sup> Wenjuan Xia,<sup>†</sup> Susan L. Morris-Natschke,<sup>‡</sup> Kuo-Hsiung Lee,<sup>‡,§</sup> Yu Zhao,<sup>\*,‡</sup>

Qiong Gu,<sup>\*,†</sup> and Jun Xu<sup>†</sup>

<sup>†</sup>Research Center for Drug Discovery, School of Pharmaceutical Sciences, Sun Yat-sen University, Guangzhou 510006, People's Republic of China

<sup>‡</sup>Natural Products Research Laboratories, UNC Eshelman School of Pharmacy, University of North Carolina, Chapel Hill, North Carolina 27599, United States

<sup>§</sup>Chinese Medicine Research and Development Center, China Medical University and Hospital, Taichung 401, Taiwan

## List of Contents

| No.                | Content                                                                                    | Page |
|--------------------|--------------------------------------------------------------------------------------------|------|
| <b>Figure S1.</b>  | The IR Spectra of Compound <b>1</b>                                                        | S4   |
| <b>Figure S2.</b>  | The EIMS Spectroscopic Data of Compound <b>1</b>                                           | S5   |
| <b>Figure S3.</b>  | The HREIMS Spectroscopic Data of Compound <b>1</b>                                         | S6   |
| <b>Figure S4.</b>  | The <sup>1</sup> H NMR Spectrum of Compound <b>1</b> in CDCl <sub>3</sub>                  | S7   |
| <b>Figure S5.</b>  | The <sup>13</sup> C NMR Spectrum of Compound <b>1</b> in CDCl <sub>3</sub>                 | S8   |
| <b>Figure S6.</b>  | The <sup>1</sup> H- <sup>1</sup> H COSY Spectrum of Compound <b>1</b> in CDCl <sub>3</sub> | S9   |
| <b>Figure S7.</b>  | The HSQC Spectrum of Compound <b>1</b> in CDCl <sub>3</sub>                                | S10  |
| <b>Figure S8.</b>  | The HMBC Spectrum of Compound <b>1</b> in CDCl <sub>3</sub>                                | S11  |
| <b>Figure S9.</b>  | The NOESY Spectrum of Compound <b>1</b> in CDCl <sub>3</sub>                               | S12  |
| <b>Figure S10.</b> | The IR Spectra of Compound <b>2</b>                                                        | S13  |
| <b>Figure S11.</b> | The HREIMS Spectroscopic Data of Compound <b>2</b>                                         | S14  |
| <b>Figure S12.</b> | The <sup>1</sup> H NMR Spectrum of Compound <b>2</b> in CDCl <sub>3</sub>                  | S15  |
| <b>Figure S13.</b> | The <sup>13</sup> C NMR Spectrum of Compound <b>2</b> in CDCl <sub>3</sub>                 | S16  |
| <b>Figure S14.</b> | The <sup>1</sup> H- <sup>1</sup> H COSY Spectrum of Compound <b>2</b> in CDCl <sub>3</sub> | S17  |
| <b>Figure S15.</b> | The HSQC Spectrum of Compound <b>2</b> in CDCl <sub>3</sub>                                | S18  |
| <b>Figure S16.</b> | The HMBC Spectrum of Compound <b>2</b> in CDCl <sub>3</sub>                                | S19  |
| <b>Figure S17.</b> | The NOESY Spectrum of Compound <b>2</b> in CDCl <sub>3</sub>                               | S20  |
| <b>Figure S18.</b> | The IR Spectra of Compound <b>3</b>                                                        | S21  |
| <b>Figure S19.</b> | The HRESIMS Spectroscopic Data of Compound <b>3</b>                                        | S22  |
| <b>Figure S20.</b> | The <sup>1</sup> H NMR Spectrum of Compound <b>3</b> in CDCl <sub>3</sub>                  | S23  |
| <b>Figure S21.</b> | The <sup>13</sup> C NMR Spectrum of Compound <b>3</b> in CDCl <sub>3</sub>                 | S24  |
| <b>Figure S22.</b> | The <sup>1</sup> H- <sup>1</sup> H COSY Spectrum of Compound <b>3</b> in CDCl <sub>3</sub> | S25  |
| <b>Figure S23.</b> | The HSQC Spectrum of Compound <b>3</b> in CDCl <sub>3</sub>                                | S26  |
| <b>Figure S24.</b> | The HMBC Spectrum of Compound <b>3</b> in CDCl <sub>3</sub>                                | S27  |
| <b>Figure S25.</b> | The NOESY Spectrum of Compound <b>3</b> in CDCl <sub>3</sub>                               | S28  |

|                    |                                                                                            |     |
|--------------------|--------------------------------------------------------------------------------------------|-----|
| <b>Figure S26.</b> | The IR Spectra of Compound <b>4</b>                                                        | S29 |
| <b>Figure S27.</b> | The HREIMS Spectroscopic Data of Compound <b>4</b>                                         | S30 |
| <b>Figure S28.</b> | The <sup>1</sup> H NMR Spectrum of Compound <b>4</b> in CDCl <sub>3</sub>                  | S31 |
| <b>Figure S29.</b> | The <sup>13</sup> C NMR Spectrum of Compound <b>4</b> in CDCl <sub>3</sub>                 | S32 |
| <b>Figure S30.</b> | The <sup>1</sup> H- <sup>1</sup> H COSY Spectrum of Compound <b>4</b> in CDCl <sub>3</sub> | S33 |
| <b>Figure S31.</b> | The HSQC Spectrum of Compound <b>4</b> in CDCl <sub>3</sub>                                | S34 |
| <b>Figure S32.</b> | The HMBC Spectrum of Compound <b>4</b> in CDCl <sub>3</sub>                                | S35 |
| <b>Figure S33.</b> | The NOESY Spectrum of Compound <b>4</b> in CDCl <sub>3</sub>                               | S36 |
| <b>Figure S34.</b> | LC-HRESIMS for methanol extract of <i>Vitex trifolia</i>                                   | S37 |
| <b>Table S1</b>    | Cytotoxicity of Compounds <b>1-4</b>                                                       | S38 |

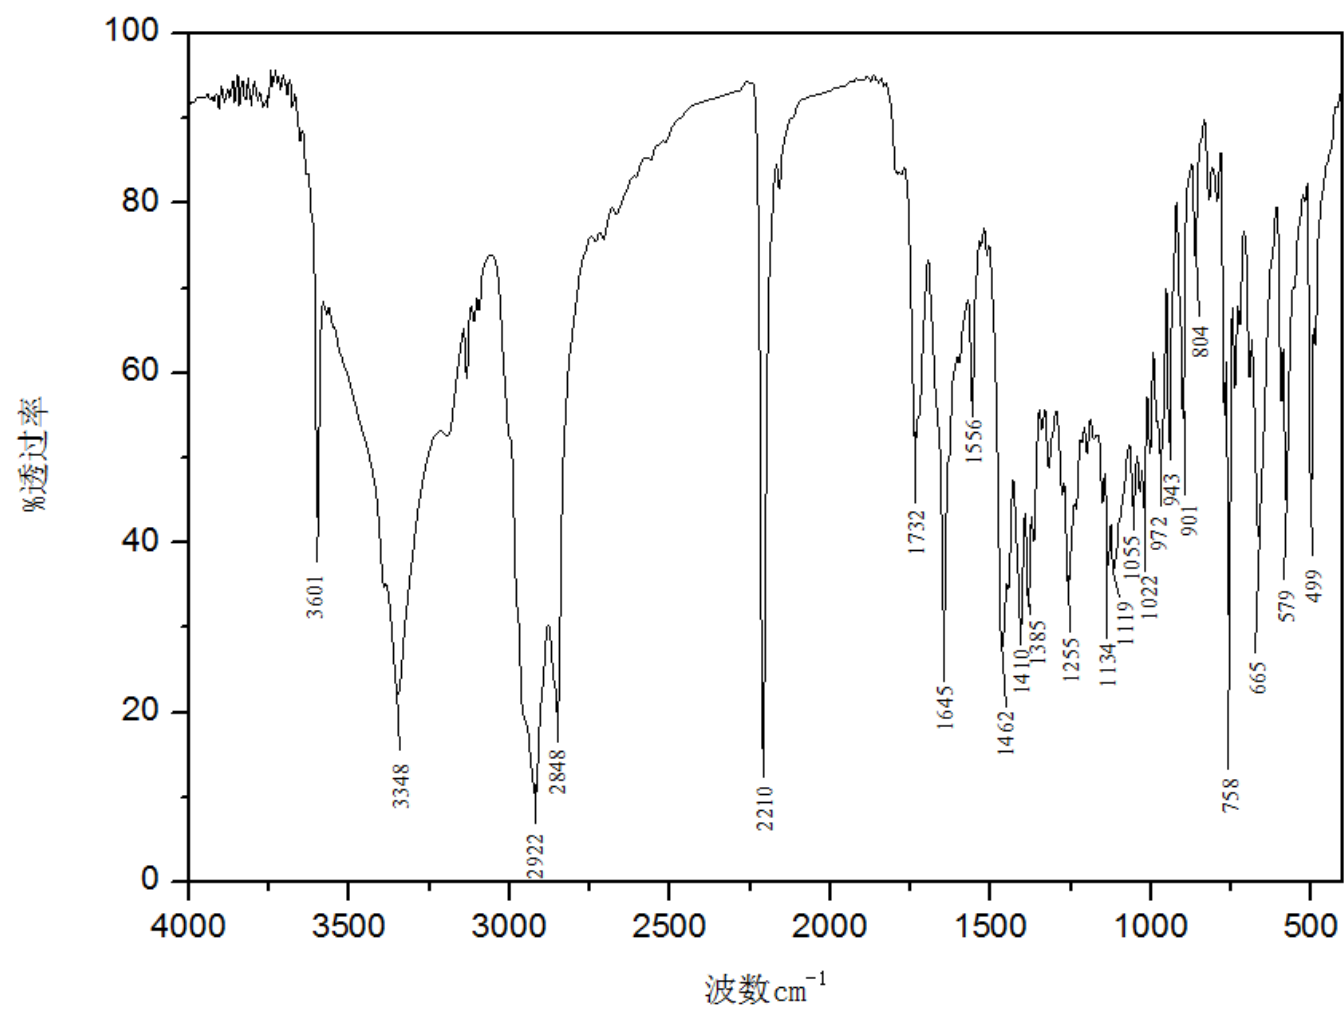

**Figure S1.** The IR Spectra of Compound **1**

Instrument:DSQ(Thermo)  
Ionization Method:EI  
D:\DSQDATA-LR\16\090209

9/

mjy-zh

090209 #56 RT: 1.45 AV: 1 NL: 2.24E7  
T: + c Full ms [45.00-800.00]

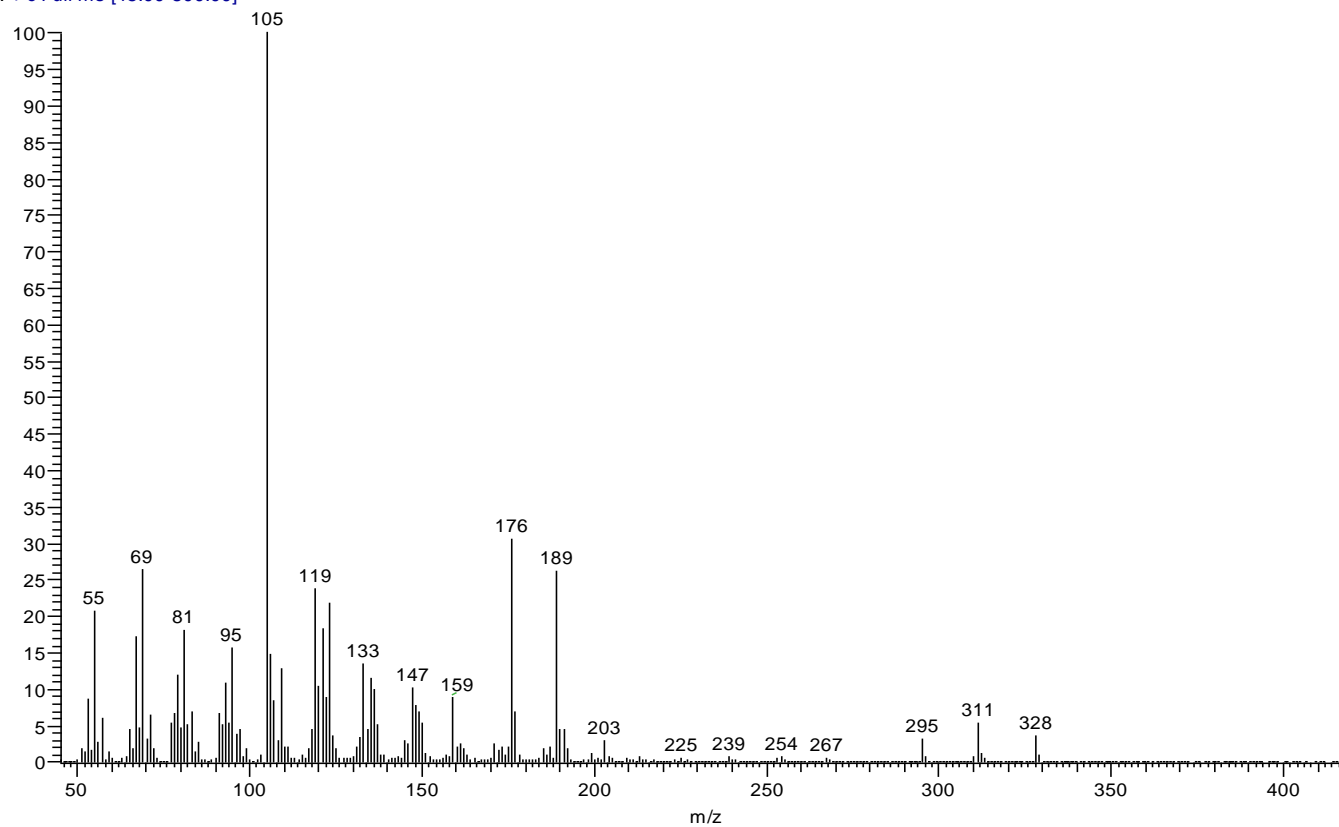

**Figure S2.** The EIMS Spectroscopic Data of Compound 1

SPECTRUM-MS  
File: D:\DATA-HR\16\090902-mjy-zh-c1.RAW  
Full ms [316.500 - 333.500] - Range: 328.200 - 328.300  
Scan No. 9 of 16  
Scan #: 9  
RT: 0.33  
Data points: 1

| Mass     | Relative Intensity | Theoretical Mass | Delta [ppm] | Delta [mmu] | RDB | Composition                                                   |
|----------|--------------------|------------------|-------------|-------------|-----|---------------------------------------------------------------|
| 328.2507 | 100.0              | 328.2509         | -0.6        | -0.2        | 7.0 | C <sub>21</sub> H <sub>32</sub> O <sub>1</sub> N <sub>2</sub> |

Instrument: MAT 95XP(Thermo)  
D:\DATA-HR\16\090902-mjy-zh-c1  
090902-mjy-zh-c1 #9 RT: 0.33 AV: 1 NL: 1.07E5  
T: + c EI Full ms [316.50-333.50]

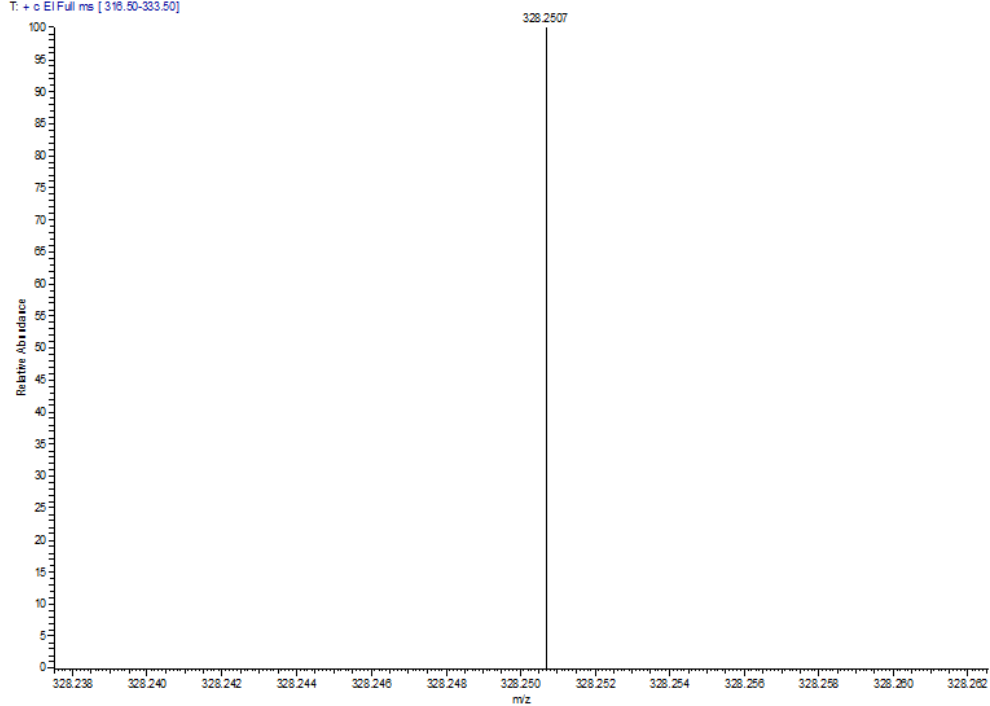

Figure S3. The HREIMS Spectroscopic Data of Compound 1

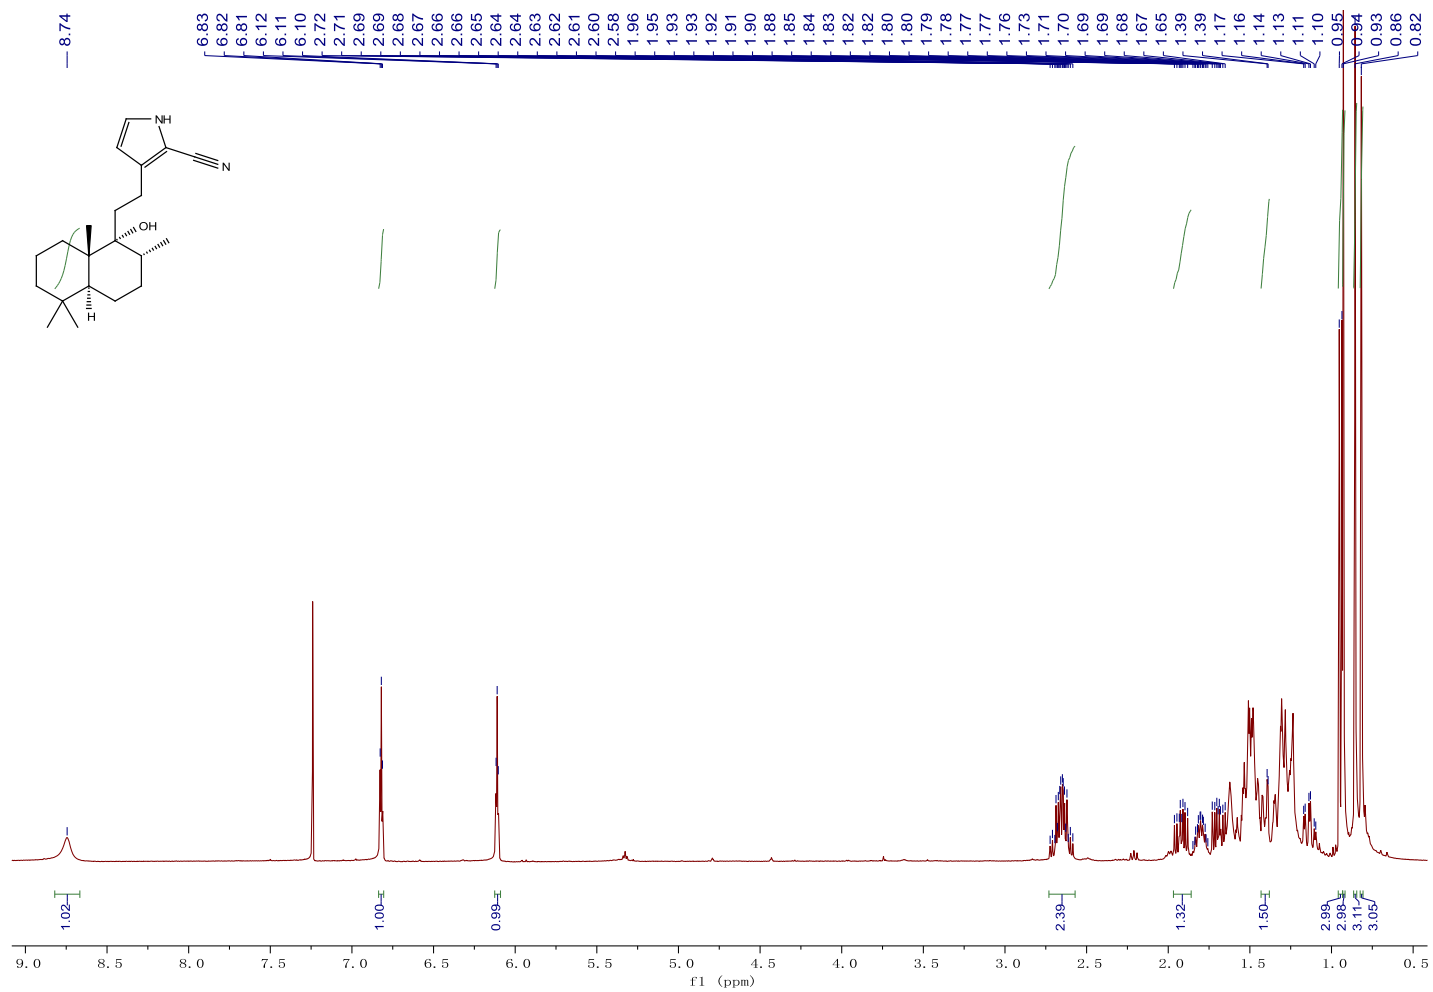

Figure S4. The <sup>1</sup>H NMR Spectrum of Compound 1 in CDCl<sub>3</sub>

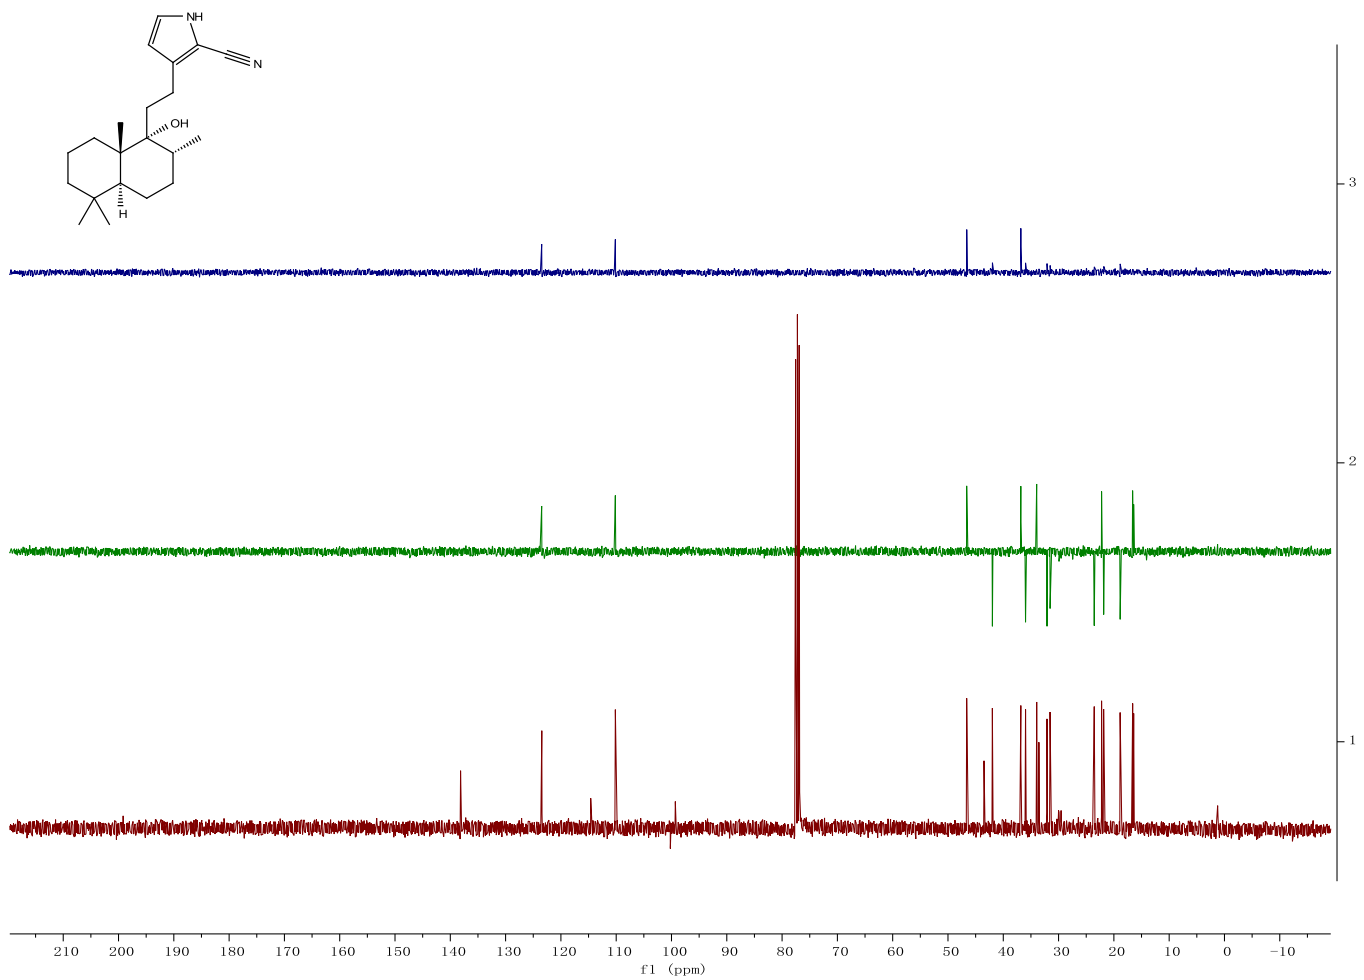

Figure S5. The  $^{13}\text{C}$  NMR Spectrum of Compound 1 in  $\text{CDCl}_3$



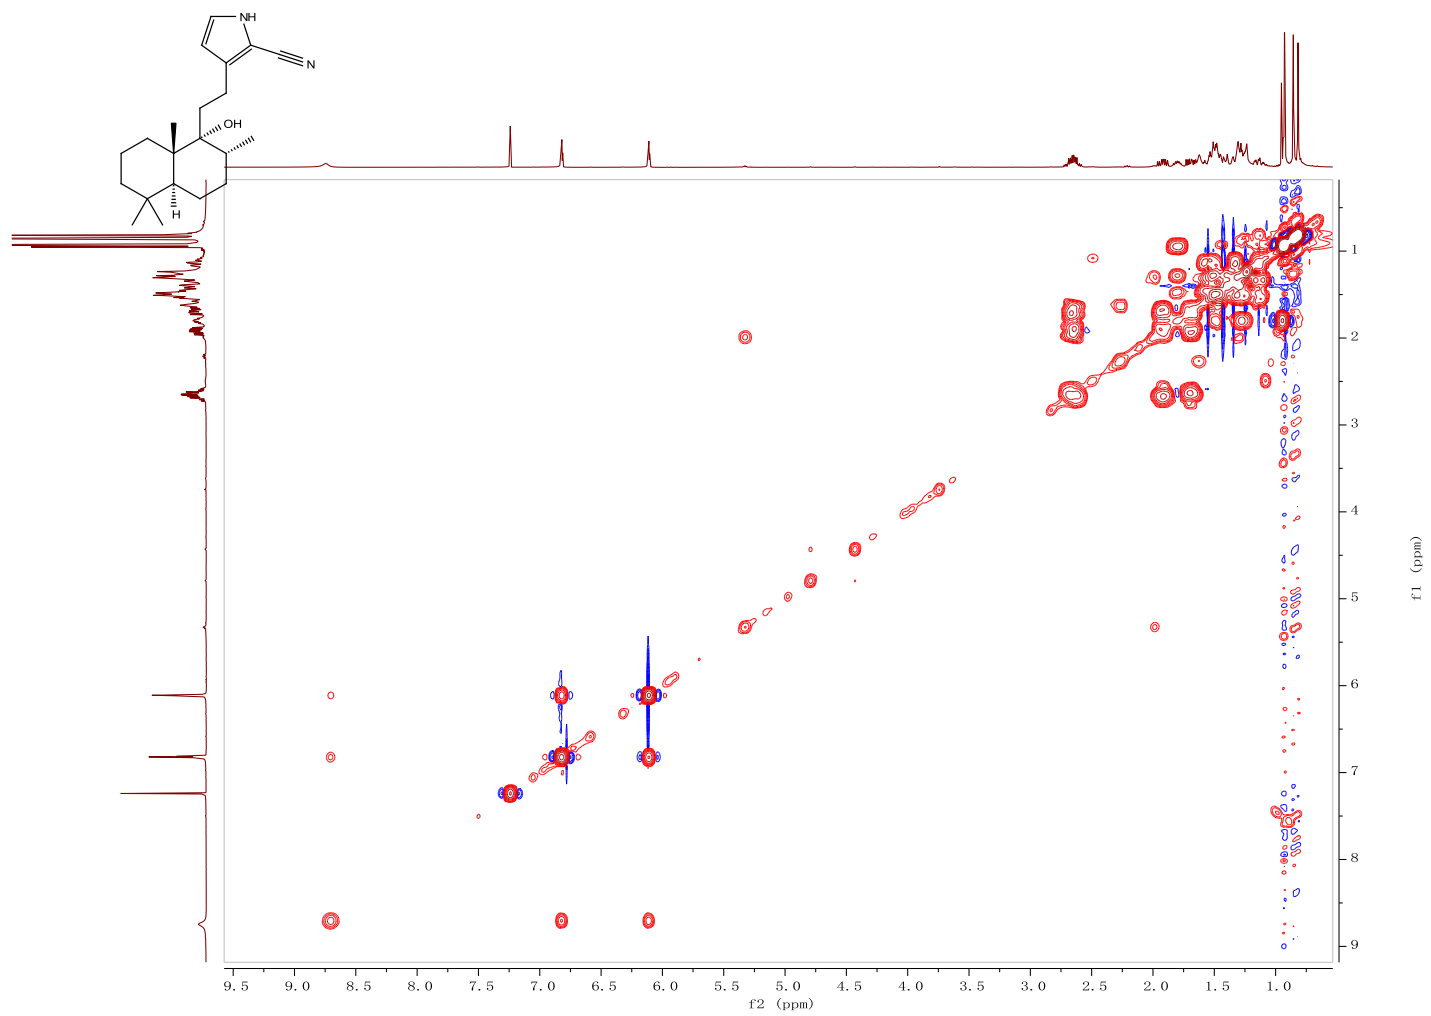

**Figure S6.** The  $^1\text{H}$ - $^1\text{H}$  COSY Spectrum of Compound **1** in  $\text{CDCl}_3$

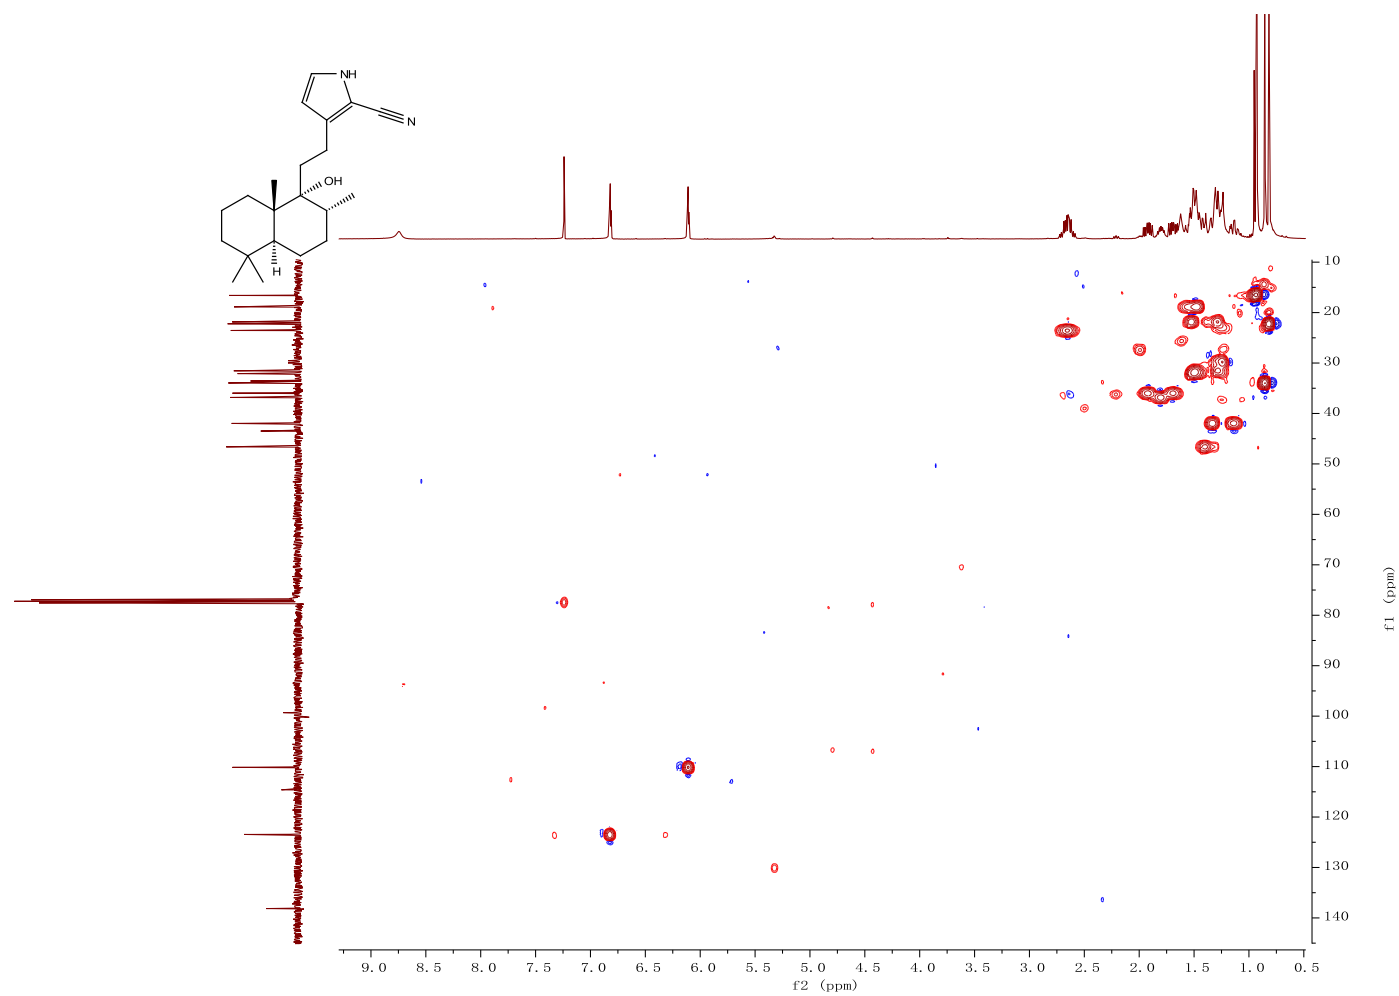

**Figure S7.** The HSQC Spectrum of Compound **1** in CDCl<sub>3</sub>

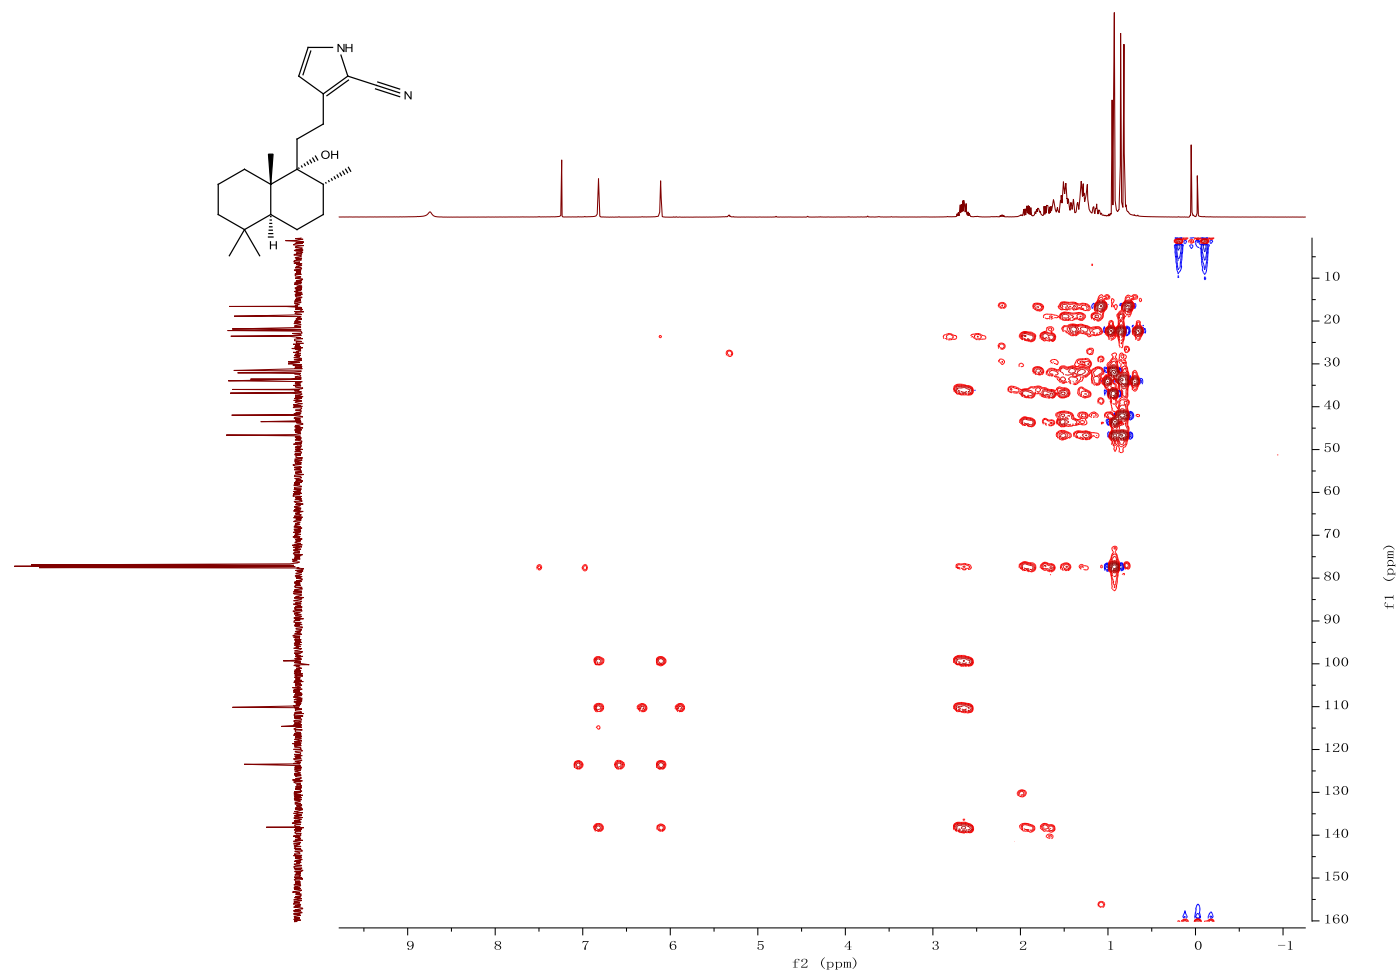

**Figure S8.** The HMBC Spectrum of Compound **1** in CDCl<sub>3</sub>

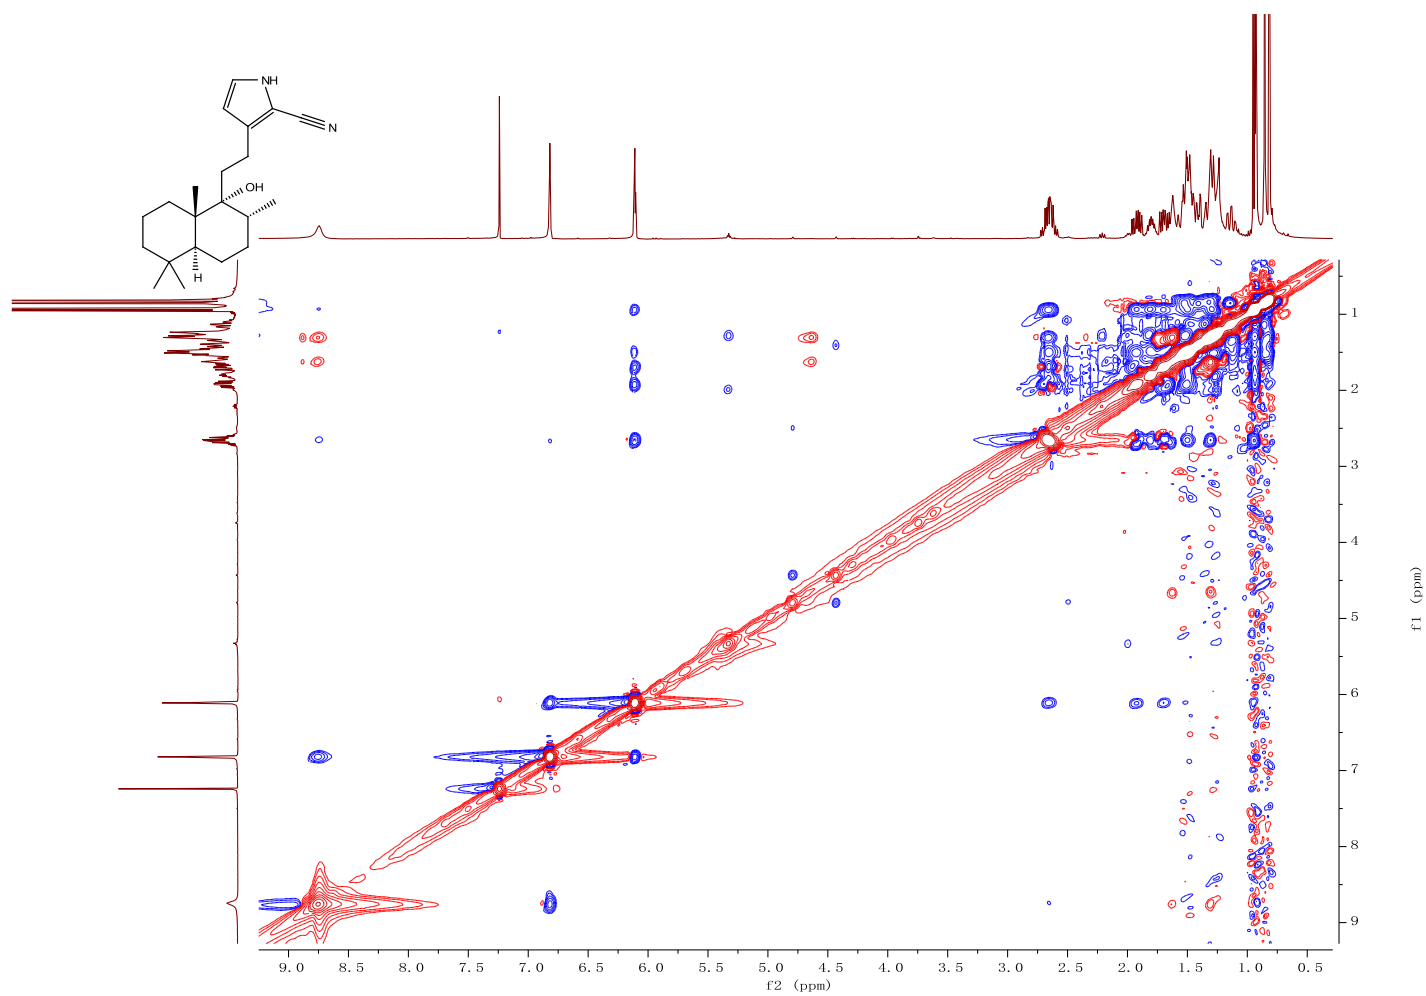

**Figure S9.** The NOESY Spectrum of Compound **1** in  $\text{CDCl}_3$

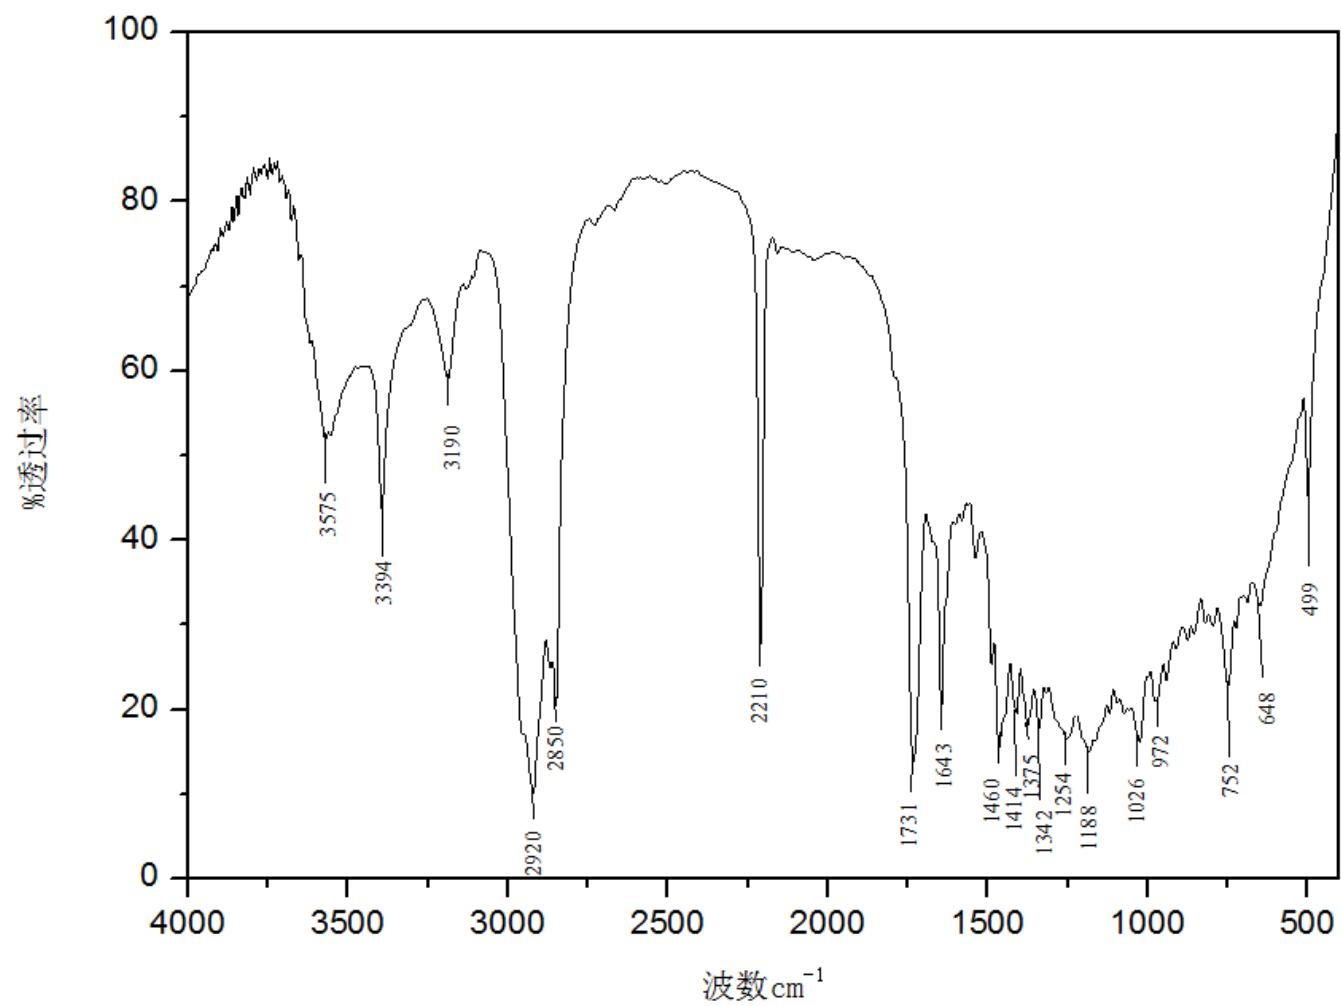

Figure S10. The IR Spectra of Compound 2

SPECTRUM-MS<sup>+</sup>

File: D:\DATA-HR\16\090902-mjy-zh-c1.RAW<sup>+</sup>

Full ms [316.500 - 333.500] - Range: 328.200 - 328.300<sup>+</sup>

Scan No. 9 of 16<sup>+</sup>

Scan #: 9<sup>+</sup>

RT: 0.33<sup>+</sup>

Data points: 1<sup>+</sup>

| Mass     | Relative Intensity | Theoretical Mass | Delta [ppm] | Delta [mmu] | RDB | Composition <sup>+</sup>                                                   |
|----------|--------------------|------------------|-------------|-------------|-----|----------------------------------------------------------------------------|
| 328.2507 | 100.0              | 328.2509         | -0.6        | -0.2        | 7.0 | C <sub>21</sub> H <sub>32</sub> O <sub>2</sub> N <sub>2</sub> <sup>+</sup> |

<sup>+</sup>

Instrument: MAT 95XP (Thermo)

D:\DATA-HR\16\090902-mjy-zh-c1

9/9/2016 10:08:48 AM

Mjy-Zh

090902-mjy-zh-c1 #9 RT: 0.33 AV: 1 NL: 1.07E5  
T: + e EI Full ms [ 316.50-333.50]

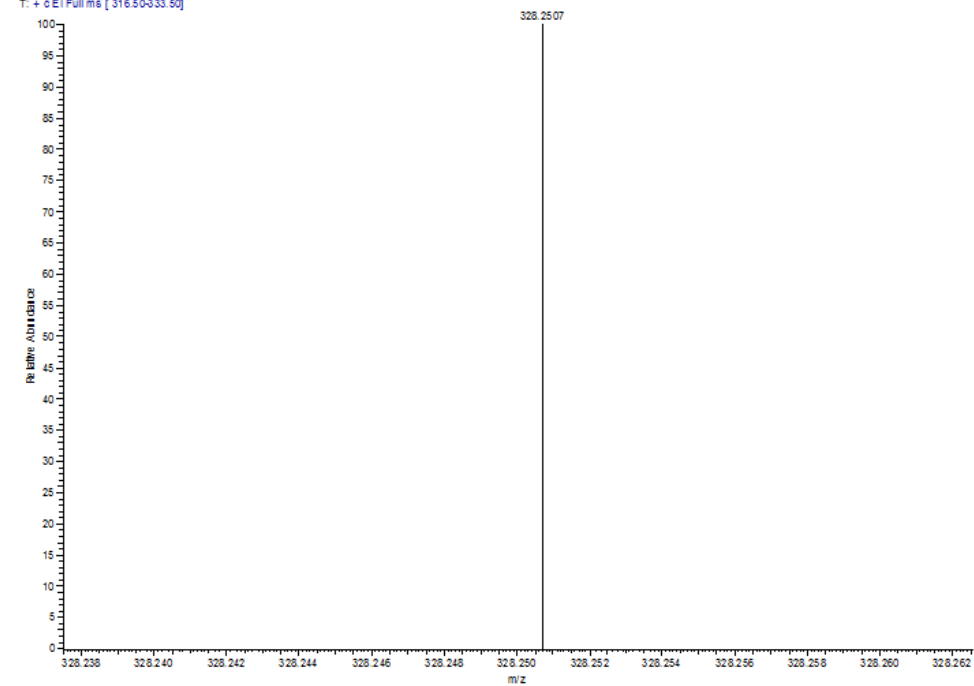

Figure S11. The HREIMS Spectroscopic Data of Compound 2

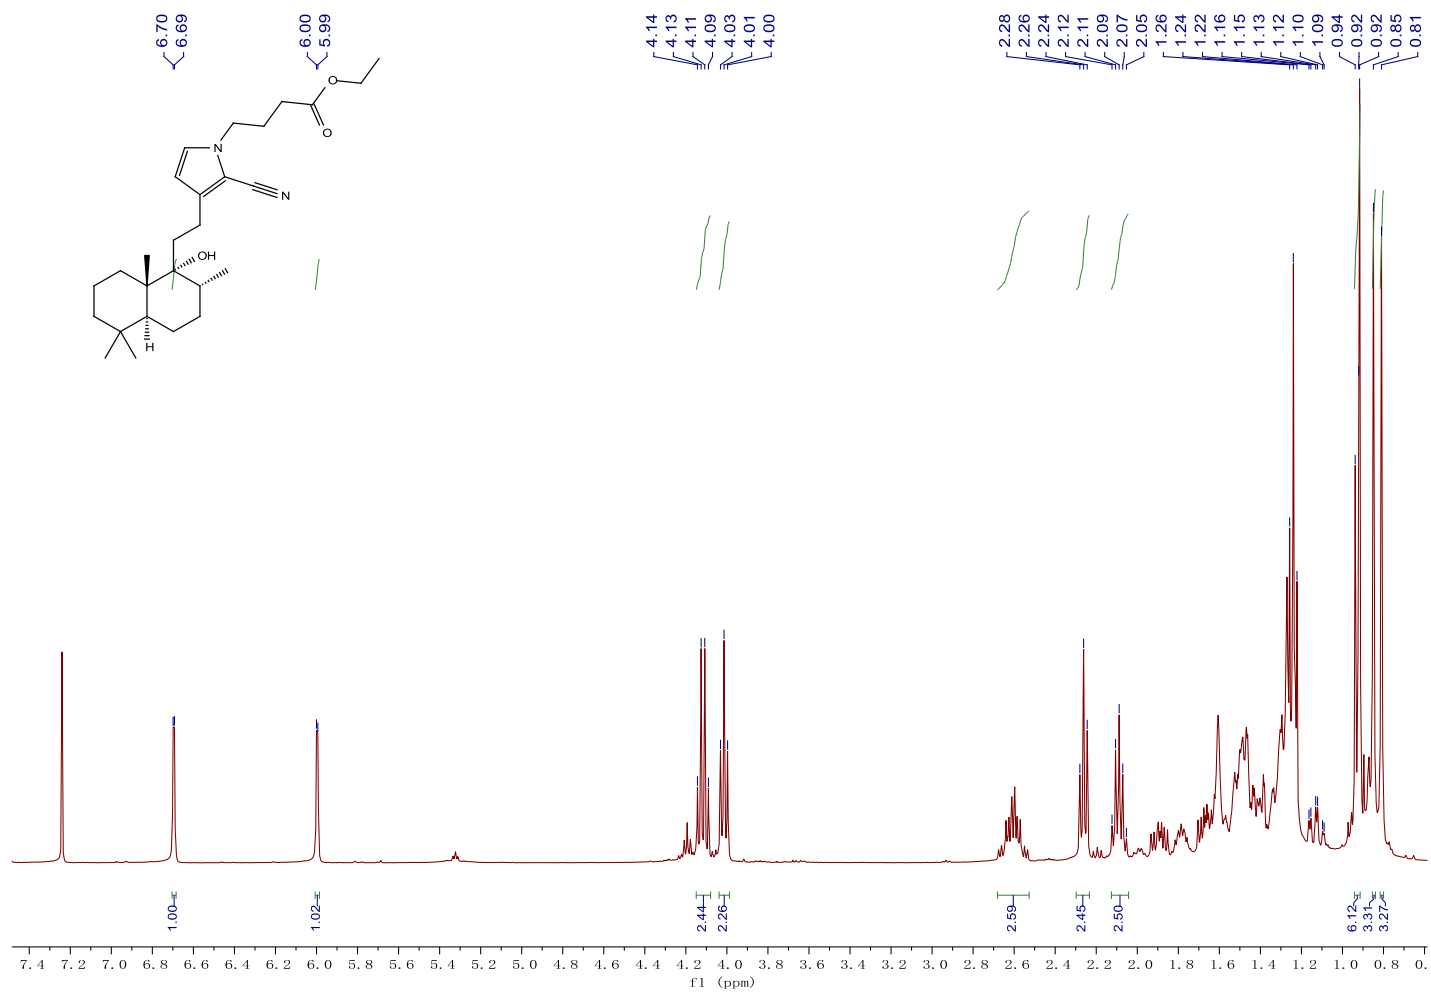

**Figure S12.** The  $^1\text{H}$  NMR Spectrum of Compound **2** in  $\text{CDCl}_3$

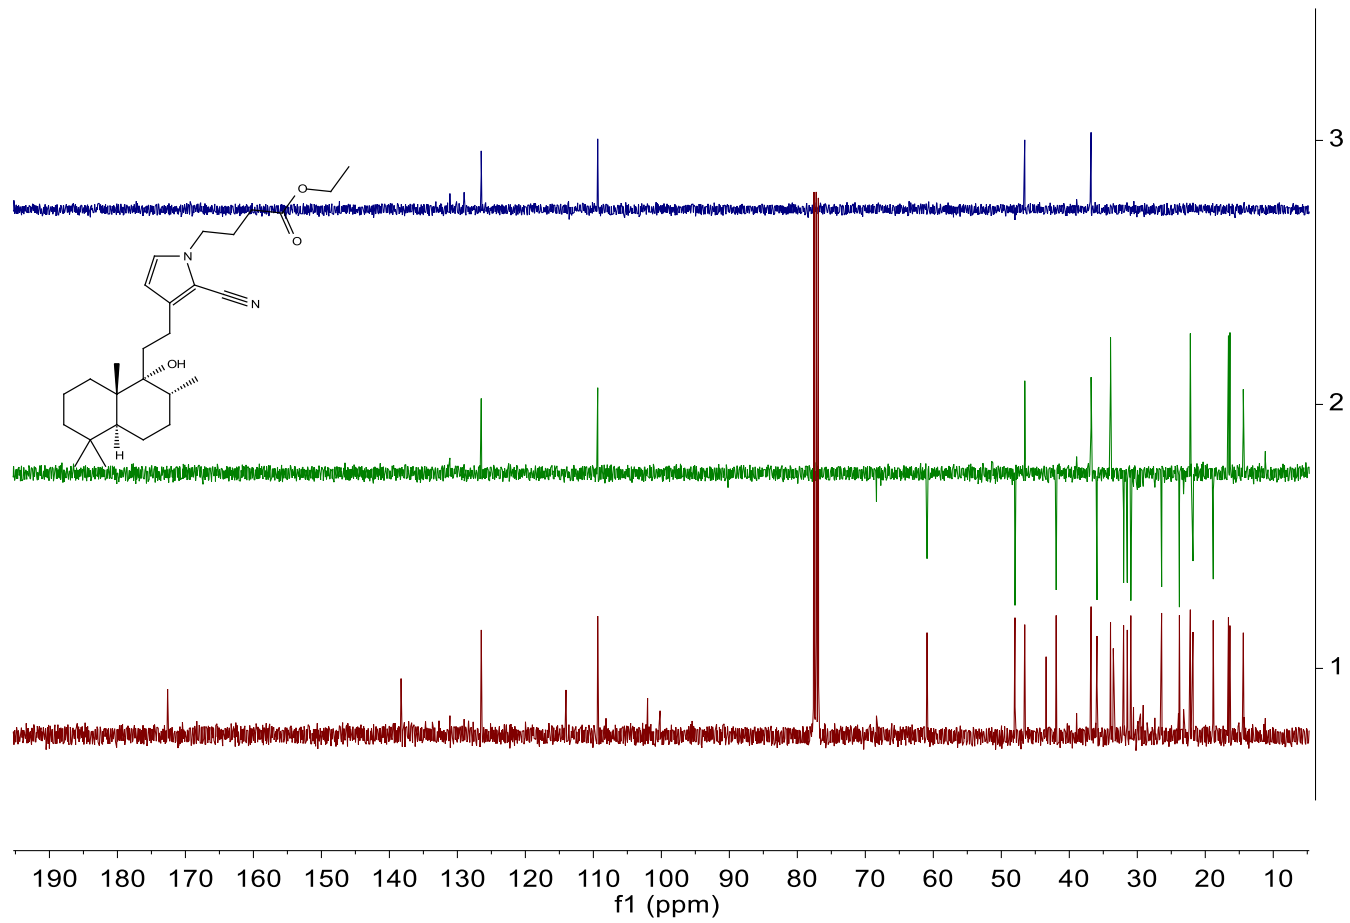

**Figure S13.** The  $^{13}\text{C}$  NMR Spectrum of Compound 2 in  $\text{CDCl}_3$



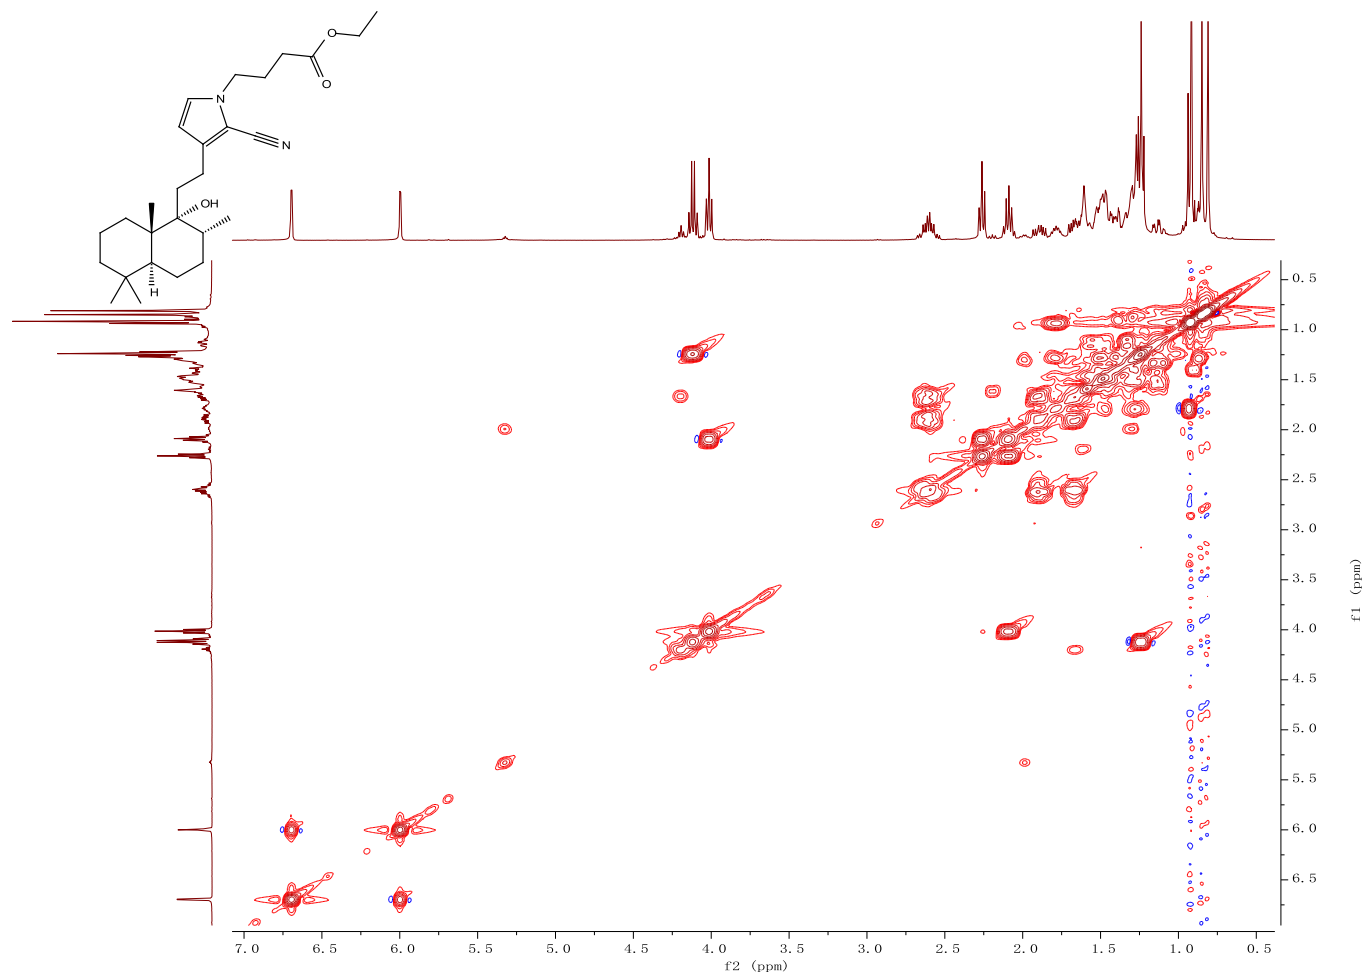

**Figure S14.** The  $^1\text{H}$ - $^1\text{H}$  COSY Spectrum of Compound **2** in  $\text{CDCl}_3$

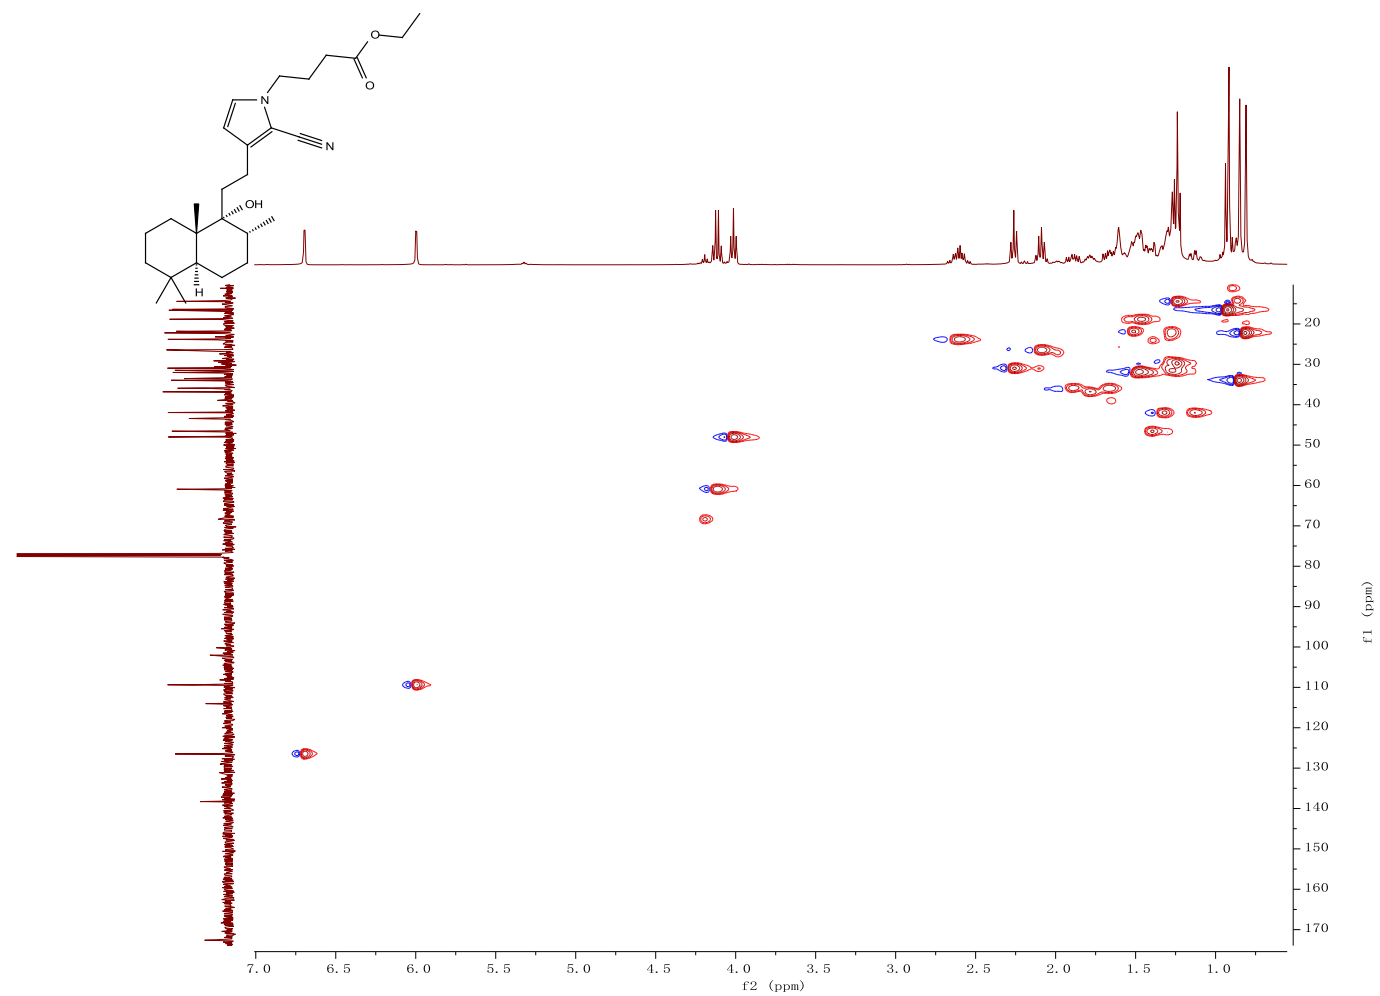

**Figure S15.** The HSQC Spectrum of Compound **2** in CDCl<sub>3</sub>

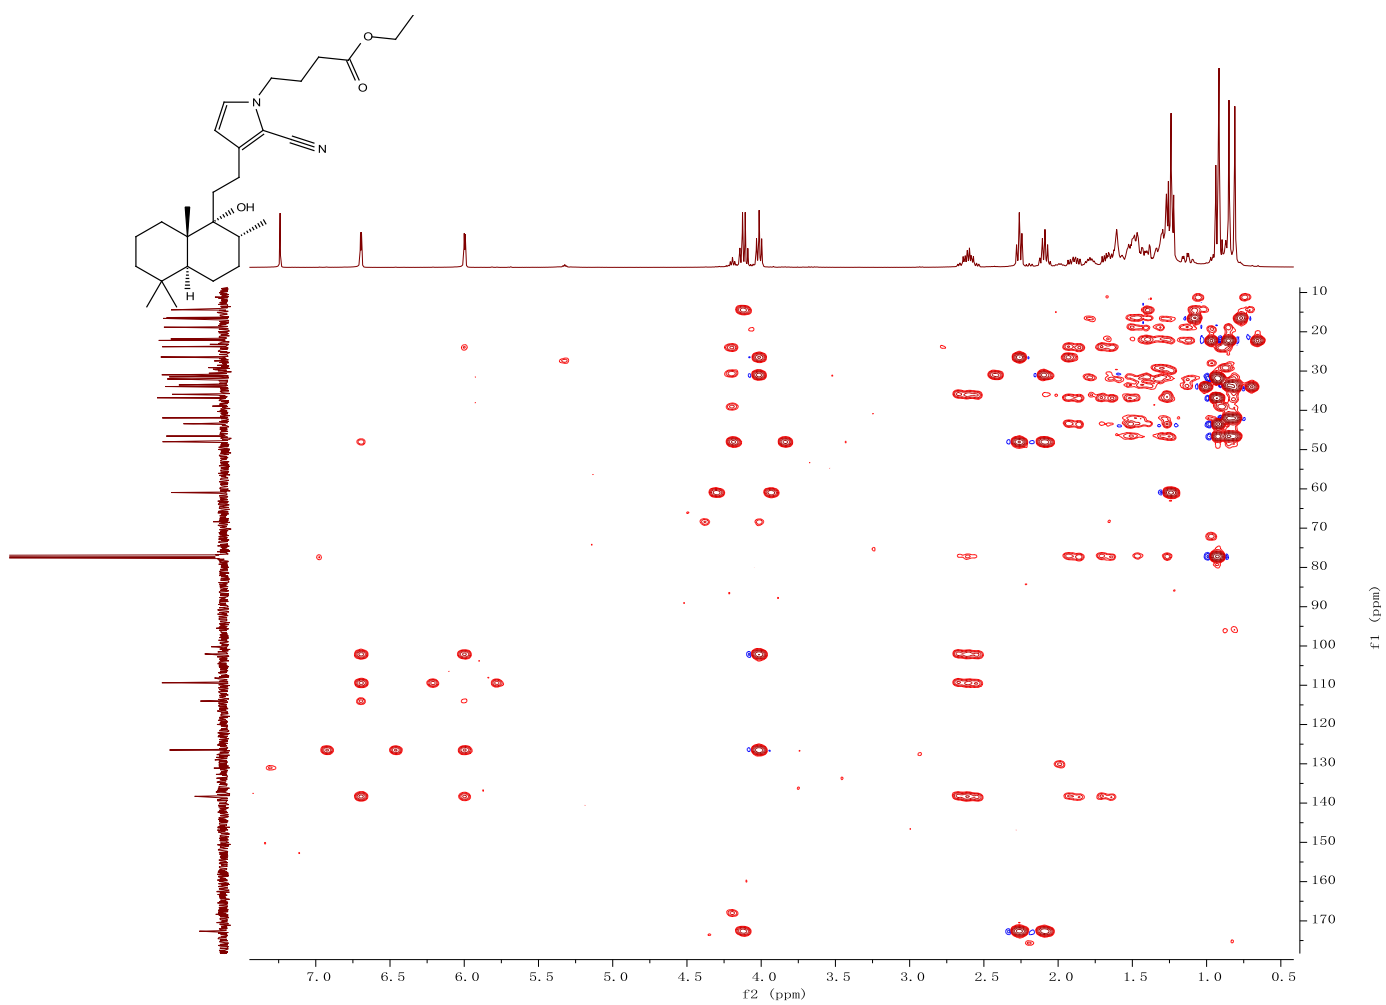

**Figure S16.** The HMBC Spectrum of Compound **2** in CDCl<sub>3</sub>

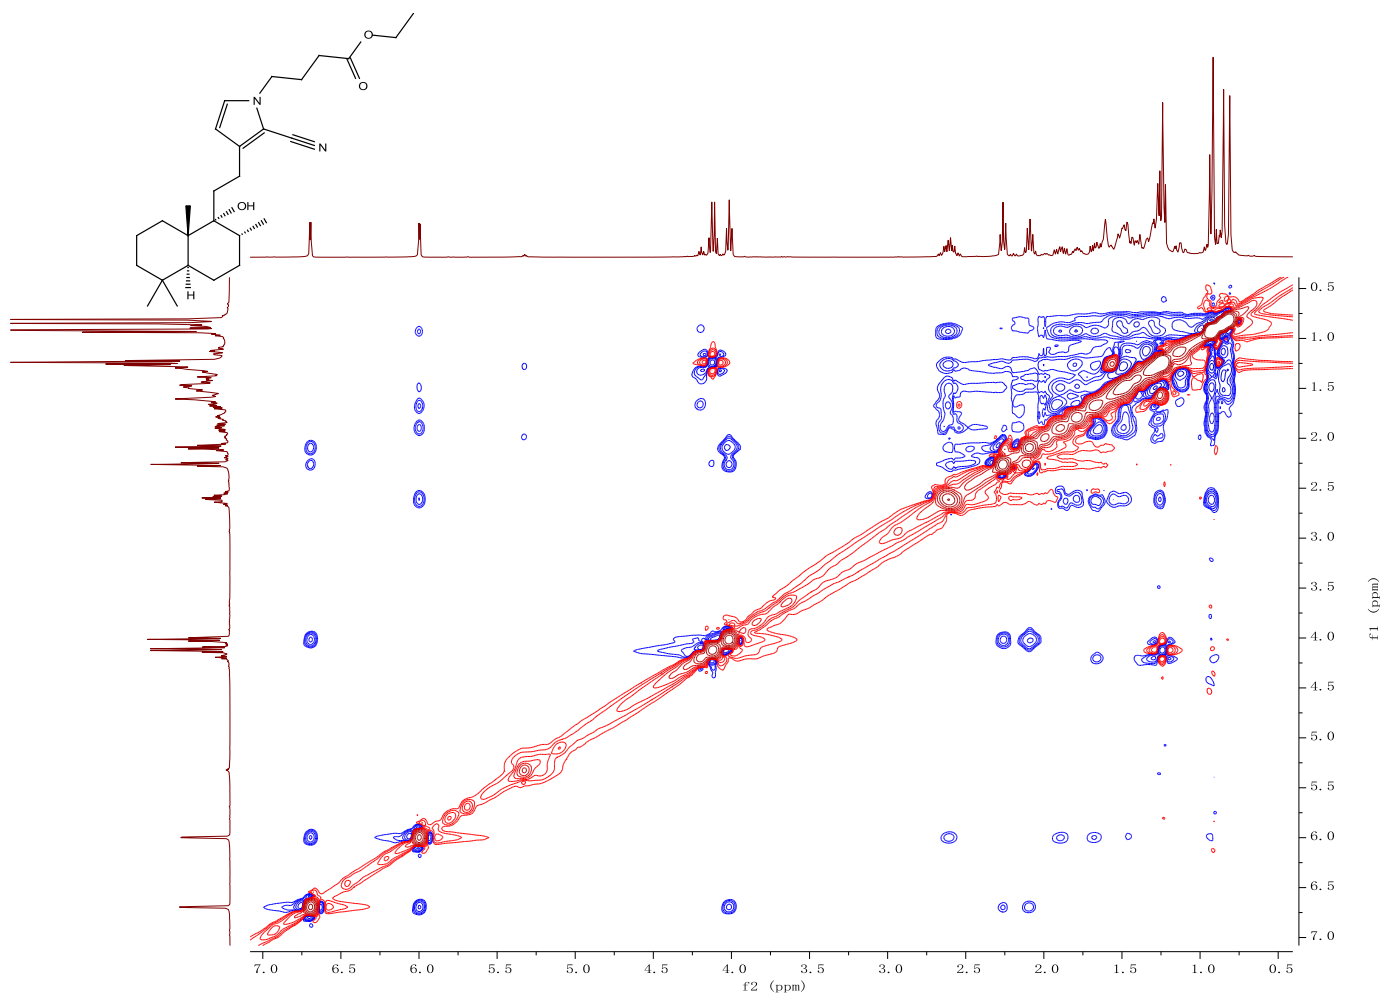

**Figure S17.** The NOESY Spectrum of Compound **2** in CDCl<sub>3</sub>

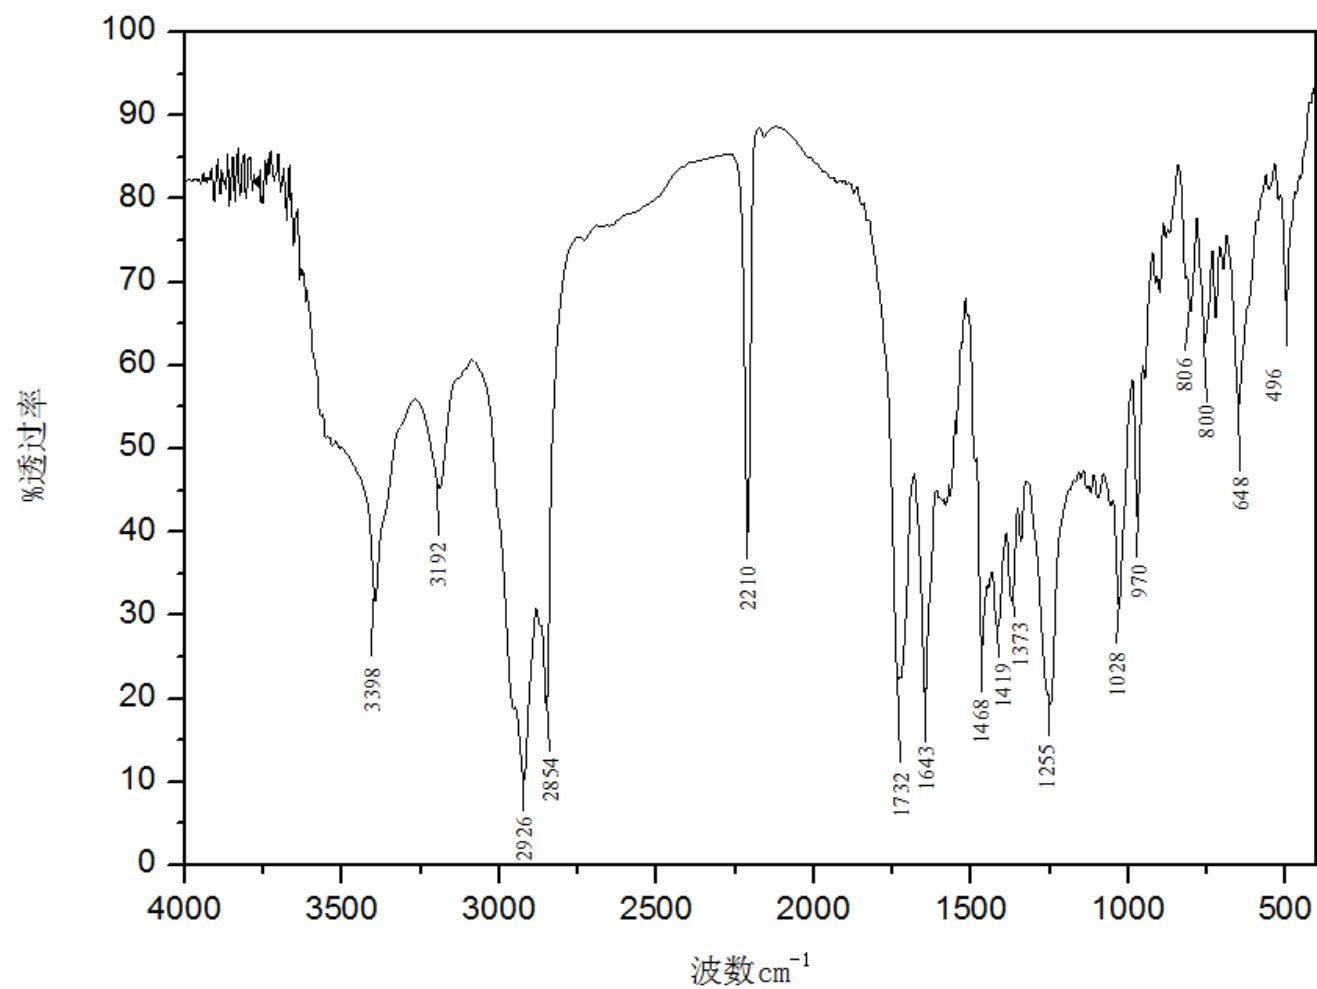

Figure S18. The IR Spectra of Compound 3

Data File: F:\高分辨数据\guojiong\lp\lp-19.Jcd

| Elmt | Val | Min | Max | Use Adduct |
|------|-----|-----|-----|------|-----|-----|-----|------|-----|-----|-----|------|-----|-----|-----|------------|
| H    | 1   | 0   | 150 | N    | 3   | 0   | 2   | Na   | 1   | 0   | 0   | K    | 1   | 0   | 0   | Na         |
| 2H   | 1   | 0   | 0   | O    | 2   | 0   | 10  | Si   | 4   | 0   | 0   | Br   | 1   | 0   | 0   |            |
| B    | 3   | 0   | 0   | 18O  | 2   | 0   | 0   | S    | 2   | 0   | 0   | I    | 3   | 0   | 0   |            |
| C    | 4   | 0   | 70  | F    | 1   | 0   | 0   | Cl   | 1   | 0   | 0   |      |     |     |     |            |

Error Margin (ppm): 100  
 HC Ratio: unlimited  
 Max Isotopes: all  
 MSn Iso RI (%): 75.00

DBE Range: -0.5 - 1000.0  
 Apply N Rule: yes  
 Isotope RI (%): 1.00  
 MSn Logic Mode: AND

Electron Ion: both  
 Use MSn Info: no  
 Isotope Res: 10000  
 Max Results: 500

Event#: 1 MS(E+) Ret. Time : 1.512 -> 1.512 Scan#: 303 -> 303

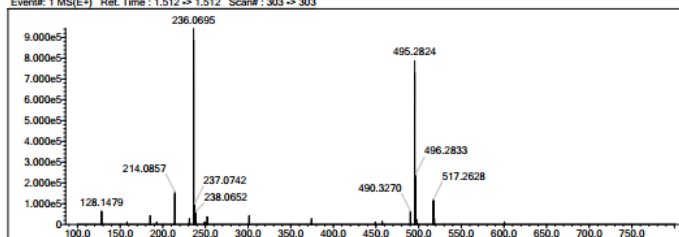

Measured region for 495.2824 m/z

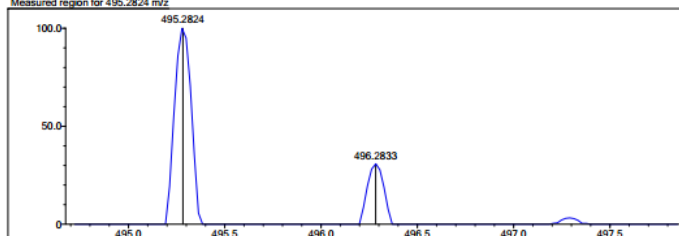

C27 H40 N2 O5 [M+Na]+ - Predicted region for 495.2829 m/z

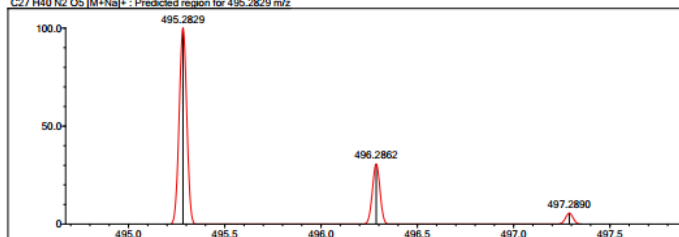

| Rank | Score | Formula (M)   | Ion     | Mass. m/z | Pred. m/z | Df. (mDa) | Df. (ppm) | Isr   | DBE |
|------|-------|---------------|---------|-----------|-----------|-----------|-----------|-------|-----|
| 1    | 79.02 | C27 H40 N2 O5 | [M+Na]+ | 495.2824  | 495.2829  | -0.5      | -1.01     | 79.04 | 9.0 |

Figure S19. The HRESIMS Spectroscopic Data of Compound 3

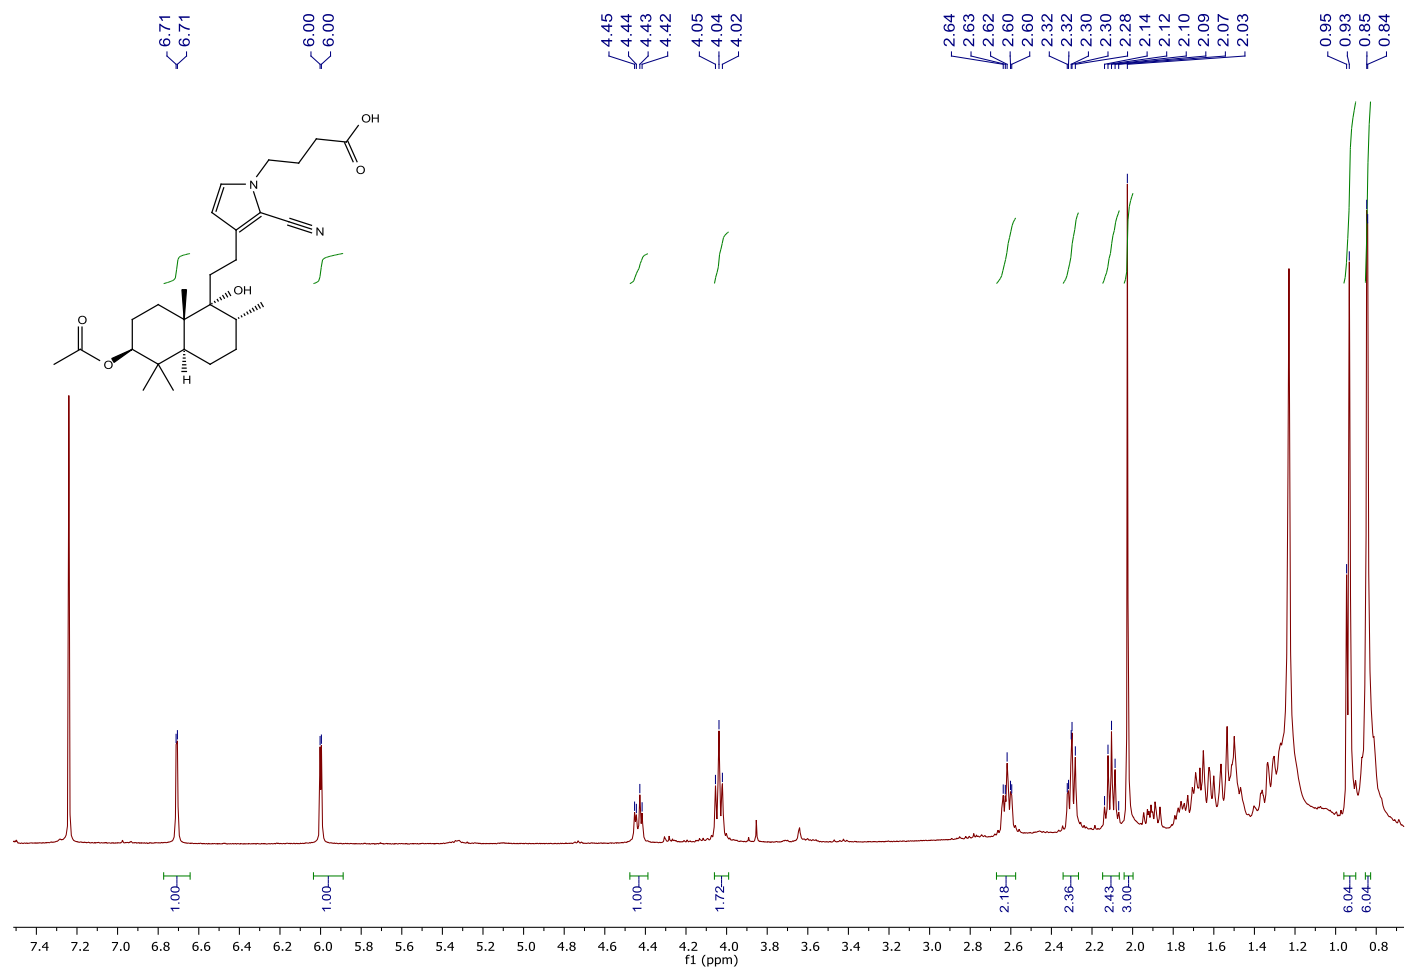

**Figure S20.** The  $^1\text{H}$  NMR Spectrum of Compound **3** in  $\text{CDCl}_3$

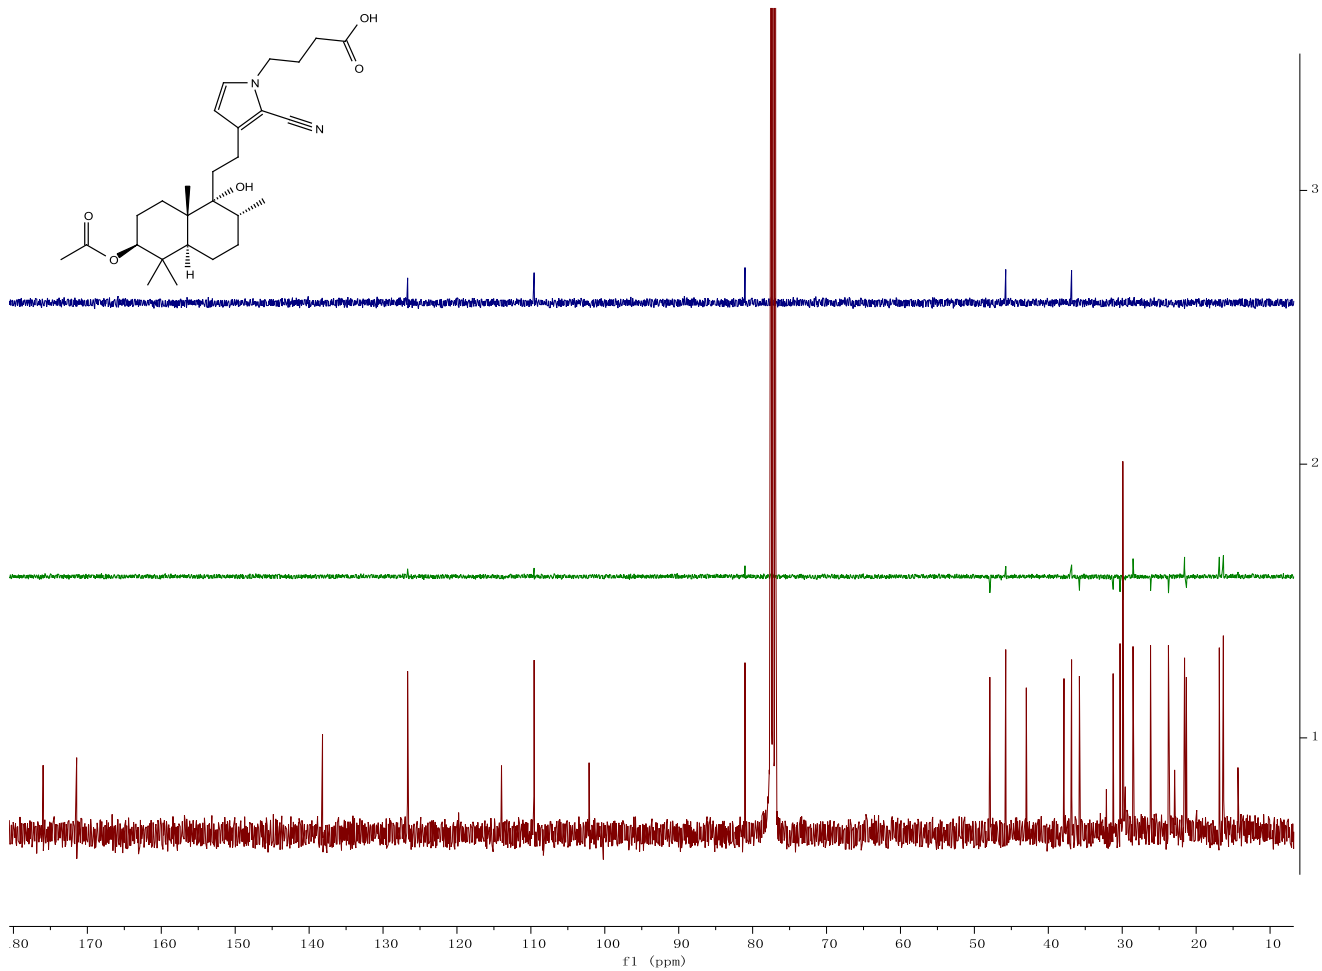

**Figure S21.** The  $^{13}\text{C}$  NMR Spectrum of Compound 3 in  $\text{CDCl}_3$



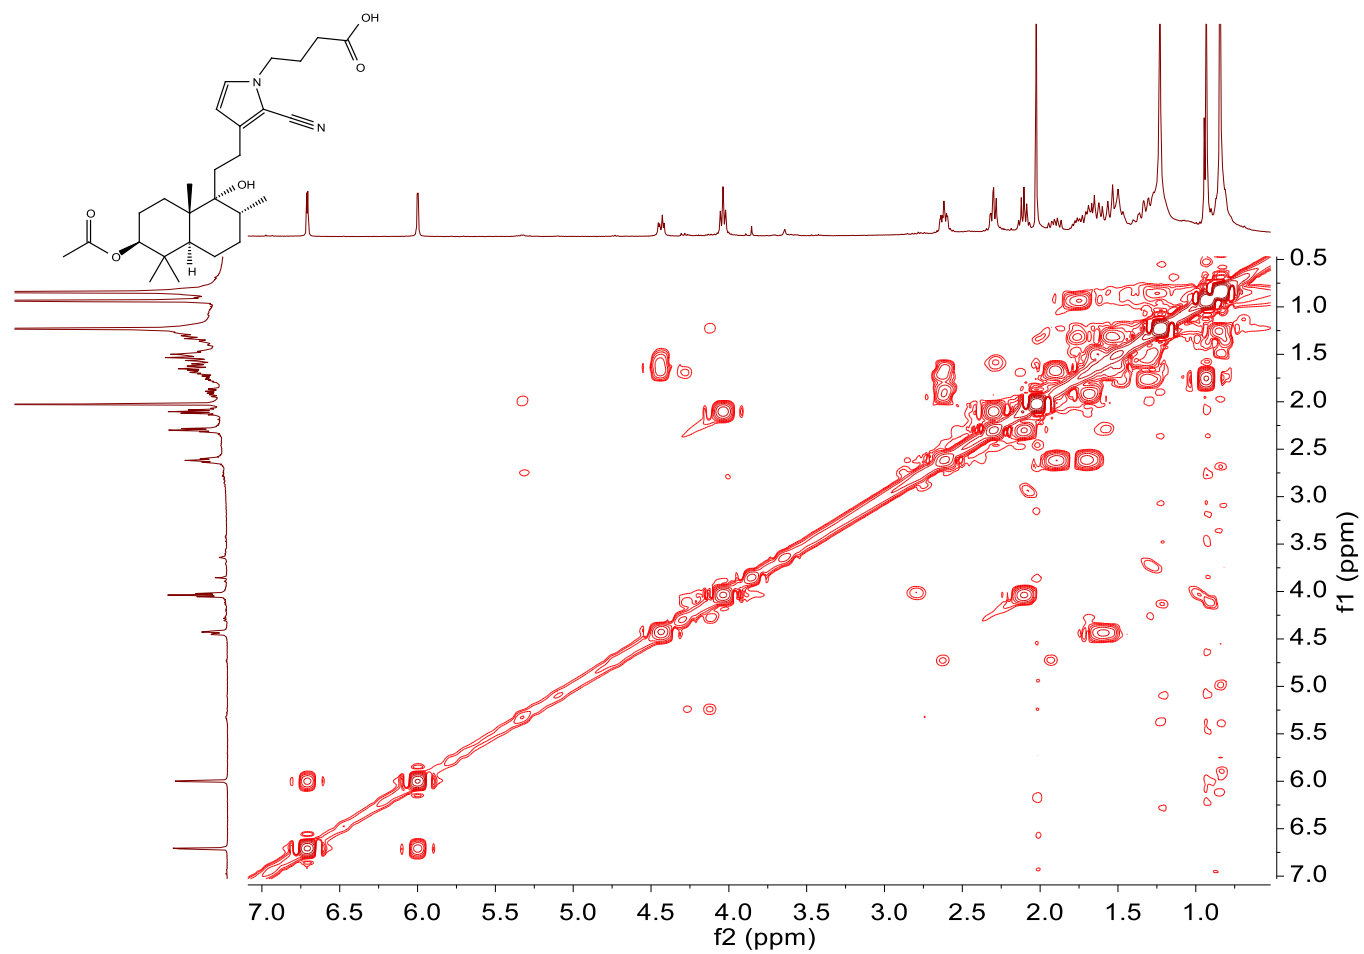

**Figure S22.** The  $^1\text{H}$ - $^1\text{H}$  COSY Spectrum of Compound **3** in  $\text{CDCl}_3$

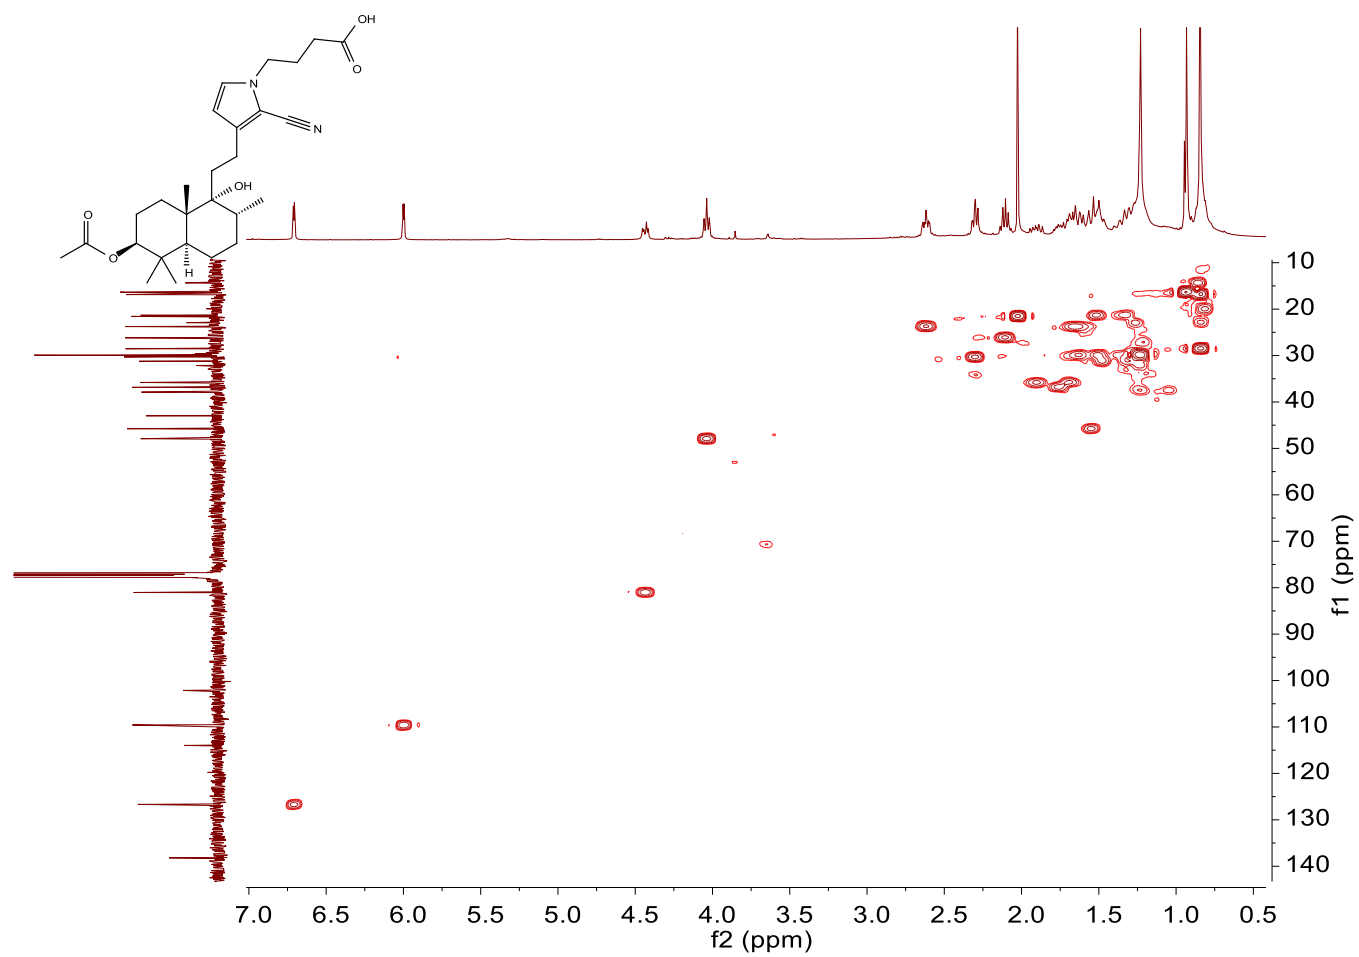

**Figure S23.** The HSQC Spectrum of Compound **3** in CDCl<sub>3</sub>

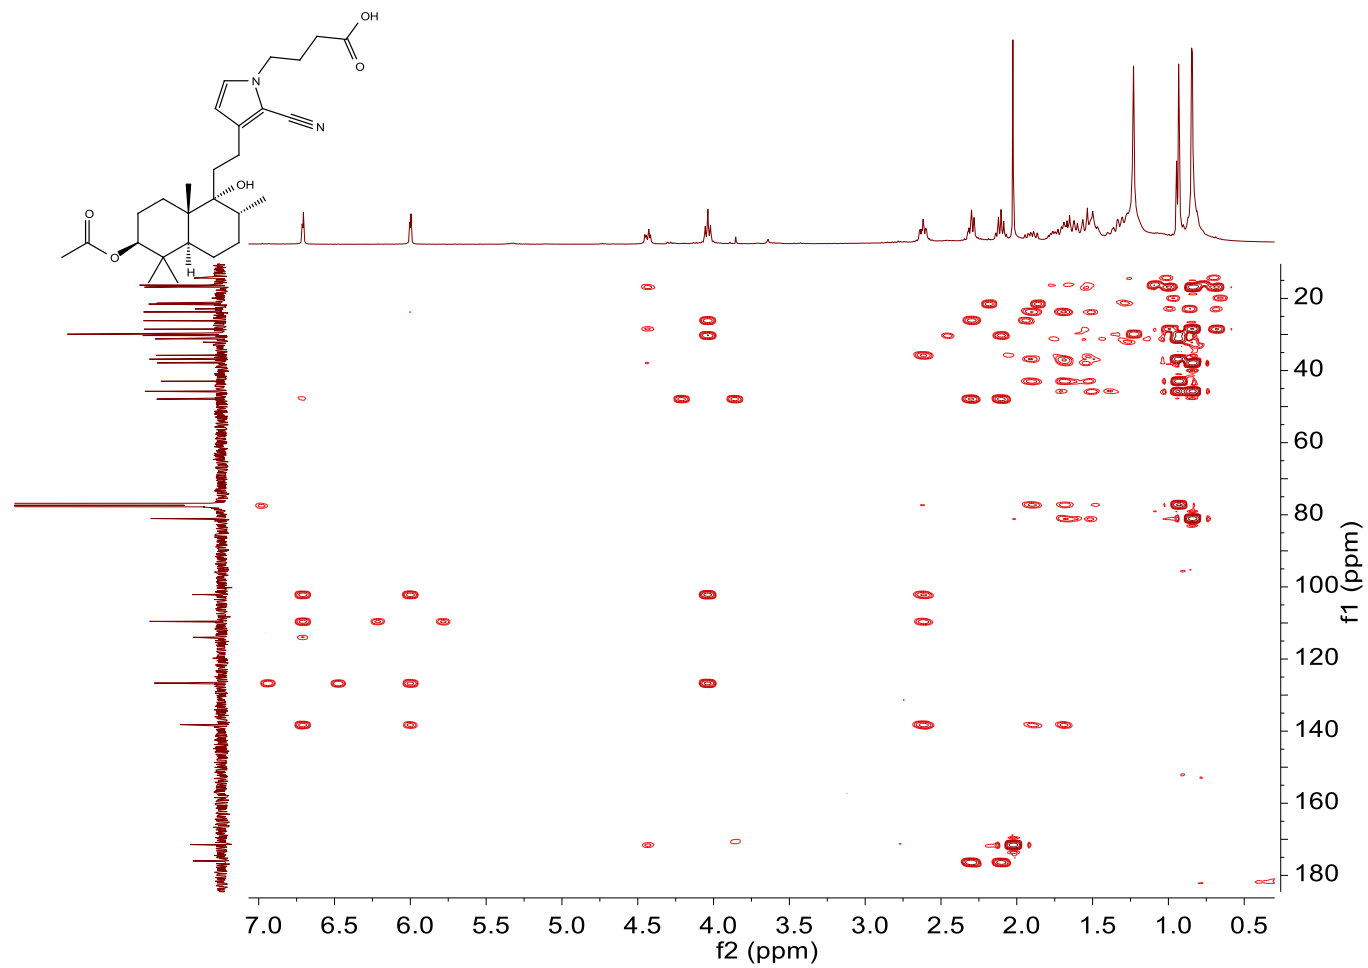

**Figure S24.** The HMBC Spectrum of Compound **3** in CDCl<sub>3</sub>

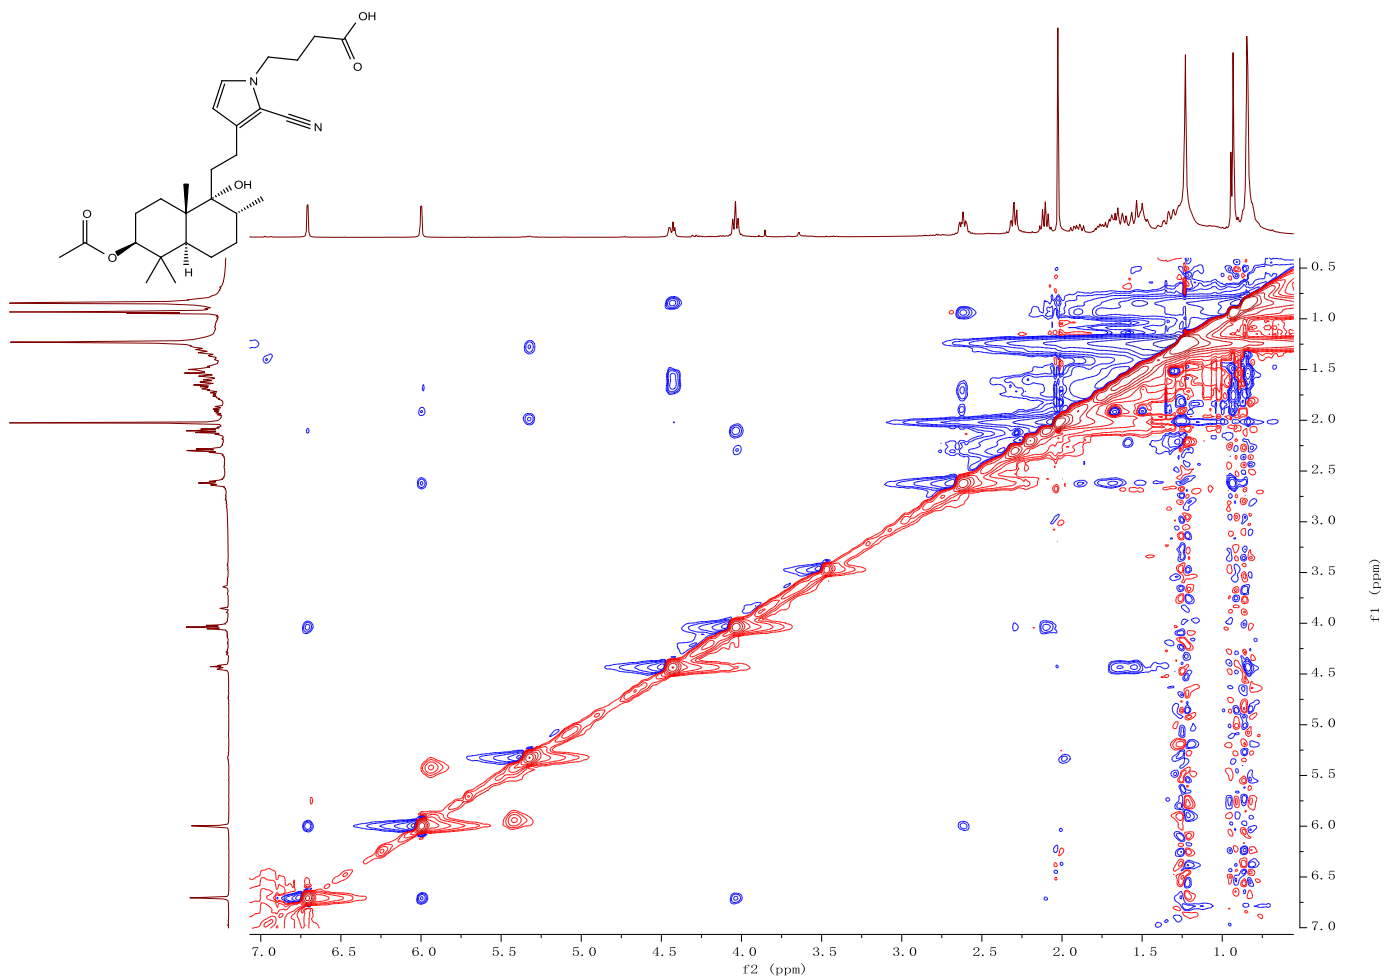

**Figure S25.** The NOESY Spectrum of Compound 3 in CDCl<sub>3</sub>

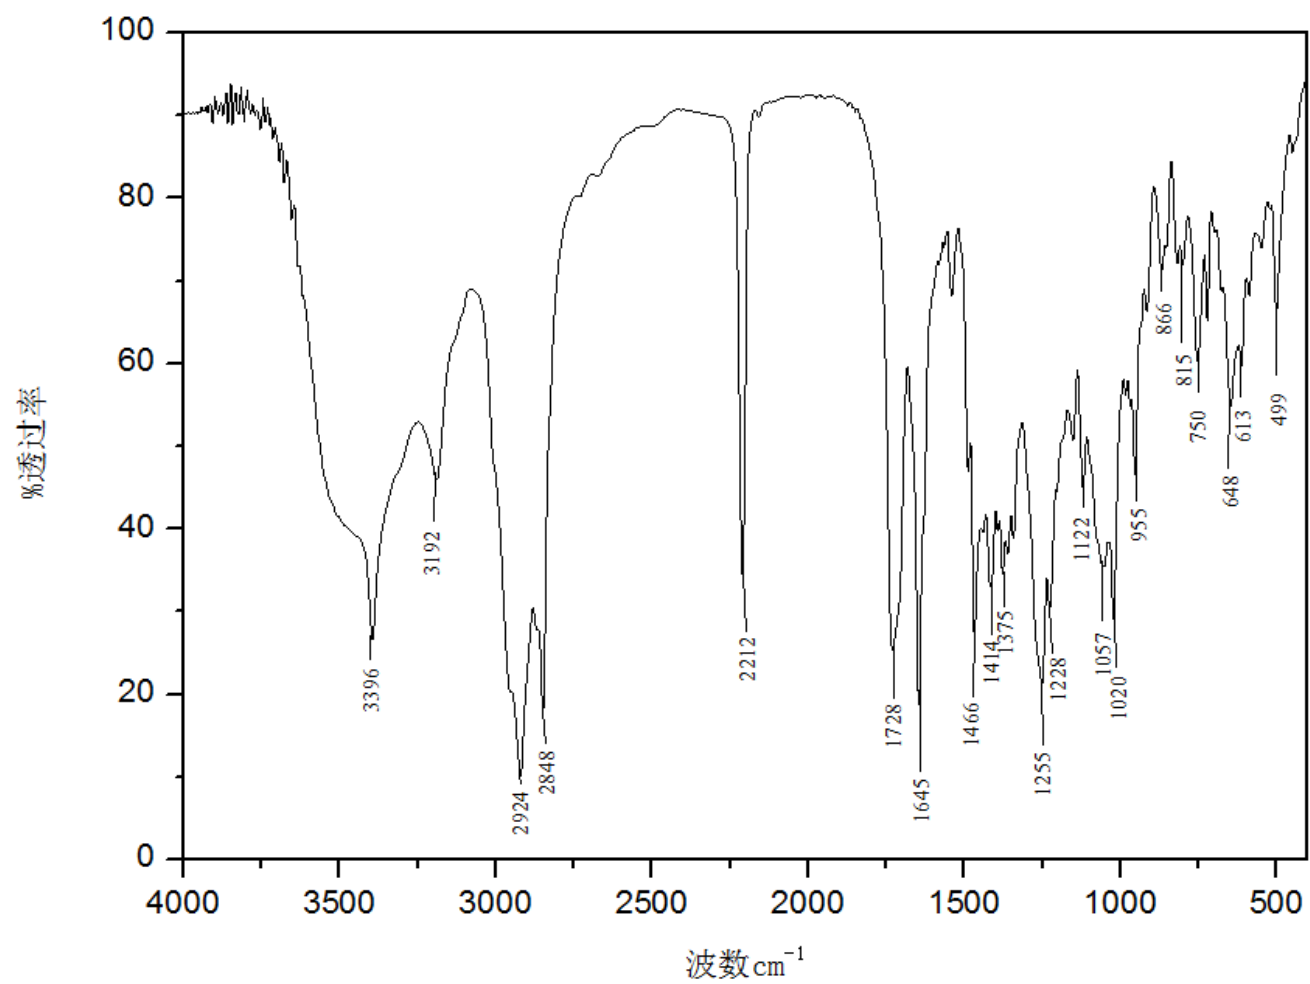

Figure S26. The IR Spectra of Compound 4

Data File: F:\高分辨数据(guajiang)\lp-28.lcd

| Elmt | Val. | Min | Max | Use Adduct |
|------|------|-----|-----|------|------|-----|-----|------|------|-----|-----|------|------|-----|-----|------------|
| H    | 1    | 0   | 150 | N    | 3    | 0   | 2   | Na   | 1    | 0   | 0   | K    | 1    | 0   | 0   | Na         |
| 2H   | 1    | 0   | 0   | O    | 2    | 0   | 10  | Si   | 4    | 0   | 0   | Br   | 1    | 0   | 0   |            |
| B    | 3    | 0   | 0   | 18O  | 2    | 0   | 0   | S    | 2    | 0   | 0   | I    | 3    | 0   | 0   |            |
| C    | 4    | 0   | 70  | F    | 1    | 0   | 0   | Cl   | 1    | 0   | 0   |      |      |     |     |            |

Error Margin (ppm): 100  
 DBE Range: -0.5 - 1000.0  
 Electron Ions: both  
 HC Ratio: unlimited  
 Apply N Rule: yes  
 Use MSn Info: no  
 Max Isotopes: all  
 Isotope RI (%): 1.00  
 Isotope Res: 10000  
 MSn Iso RI (%): 75.00  
 MSn Logic Mode: AND  
 Max Results: 500

Event#: 1 MS(E+) Ret. Time: 1.052 Scan#: 211

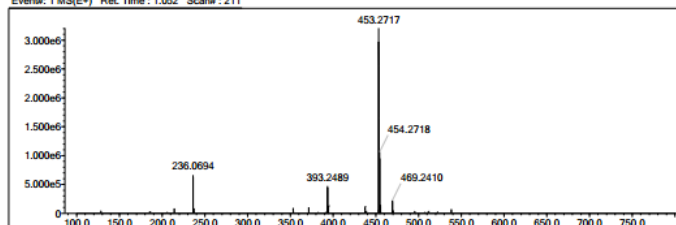

Measured region for 453.2717 m/z

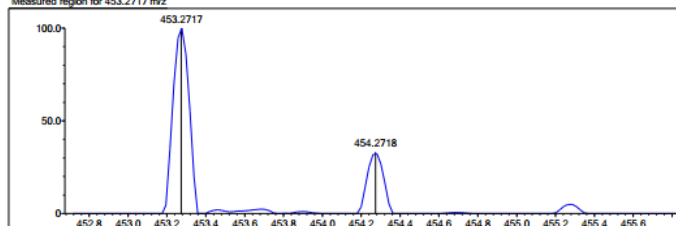

C25 H38 N2 O4 [M+Na]+ : Predicted region for 453.2724 m/z

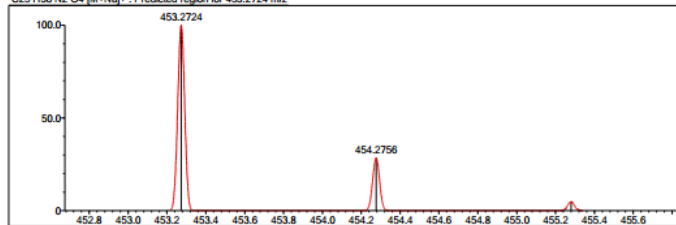

| Rank | Score | Formula (M)   | Ion     | Meas. m/z | Pred. m/z | Df. (mDa) | Df. (ppm) | Iso   | DBE |
|------|-------|---------------|---------|-----------|-----------|-----------|-----------|-------|-----|
| 1    | 85.61 | C25 H38 N2 O4 | [M+Na]+ | 453.2717  | 453.2724  | -0.7      | +1.54     | 86.78 | 8.0 |

Figure S27. The HRESIMS Spectroscopic Data of Compound 4

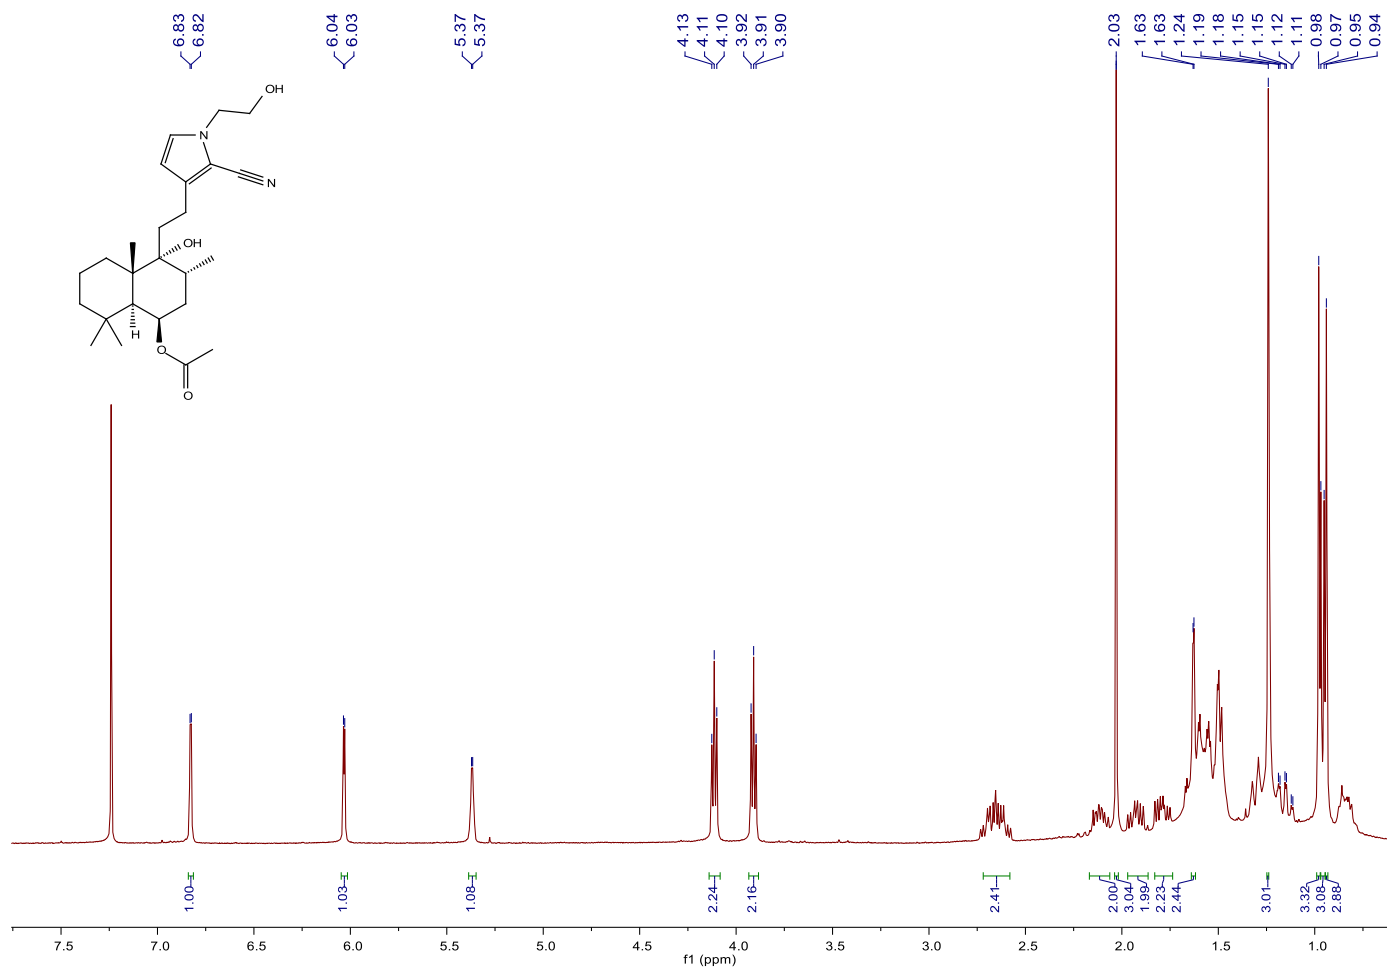

**Figure S28.** The <sup>1</sup>H NMR Spectrum of Compound 4 in CDCl<sub>3</sub>

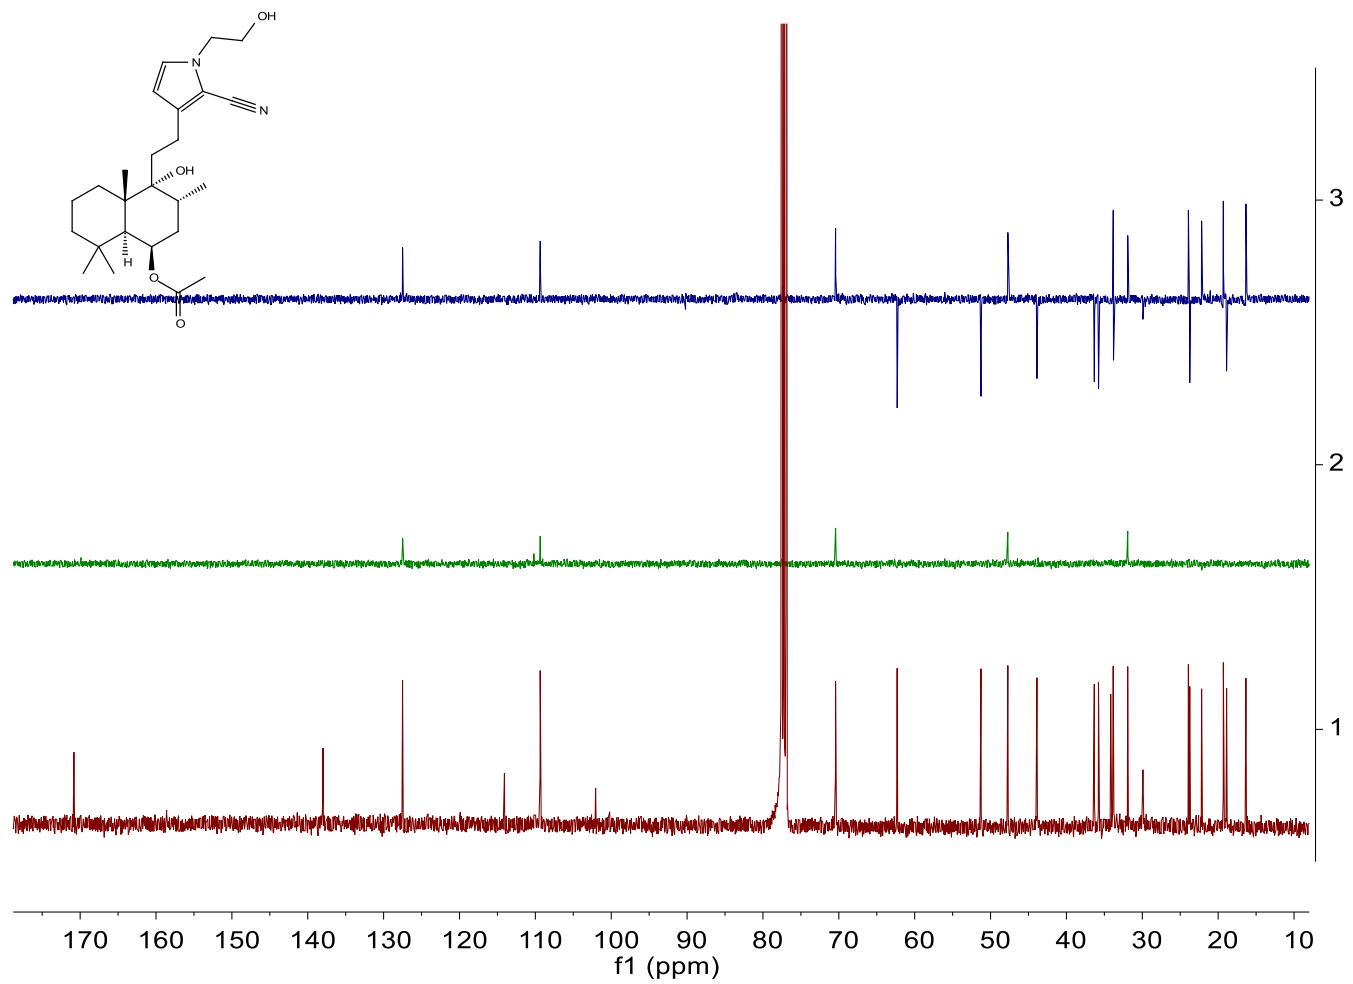

**Figure S29.** The  $^{13}\text{C}$  NMR Spectrum of Compound 4 in  $\text{CDCl}_3$



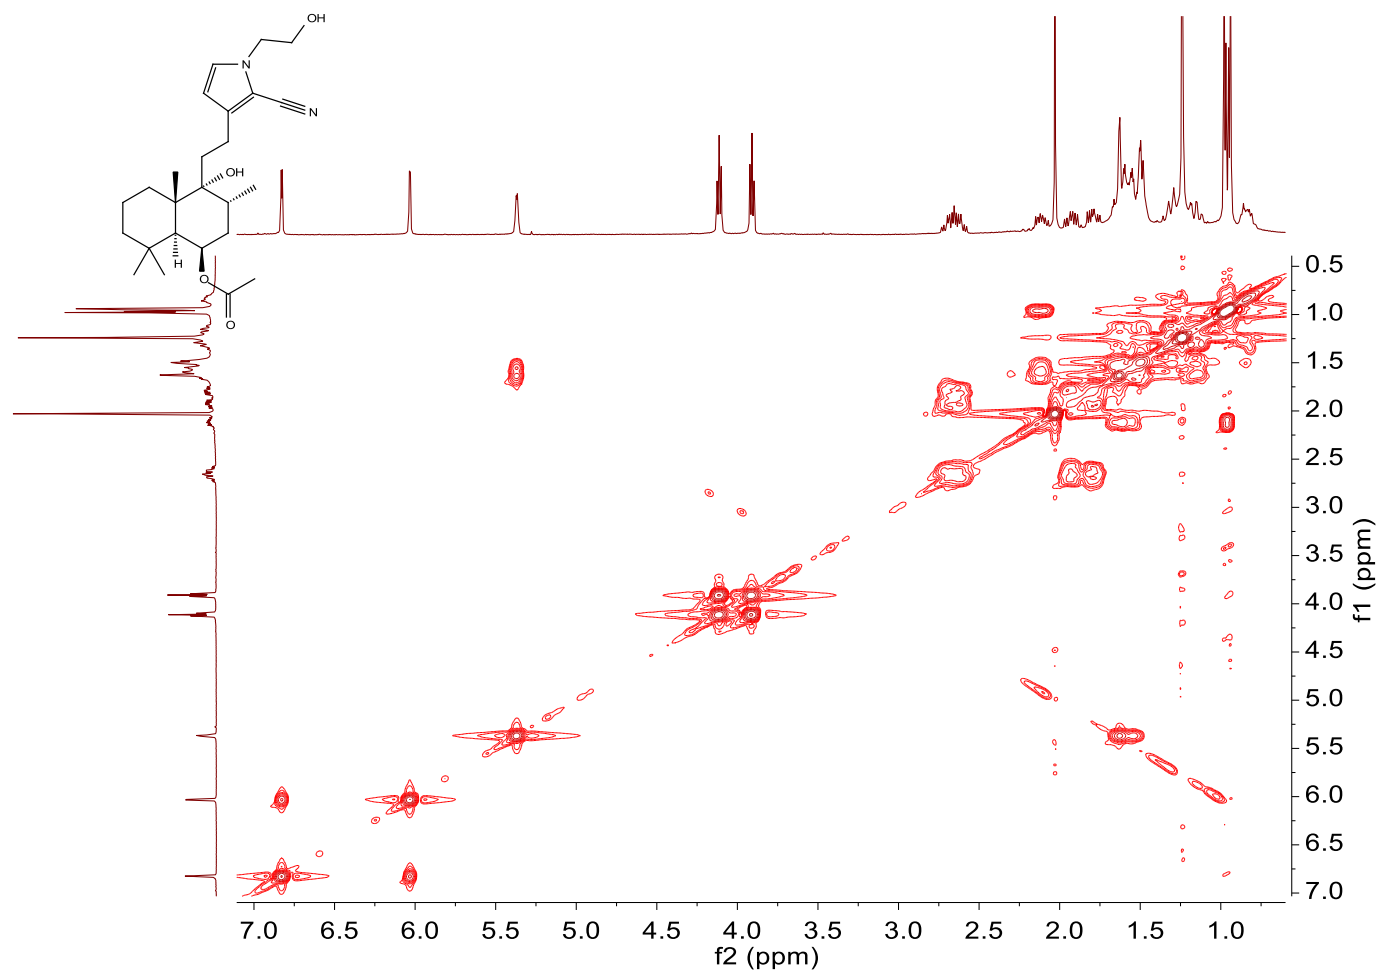

**Figure S30.** The  $^1\text{H}$ - $^1\text{H}$  COSY Spectrum of Compound **4** in  $\text{CDCl}_3$

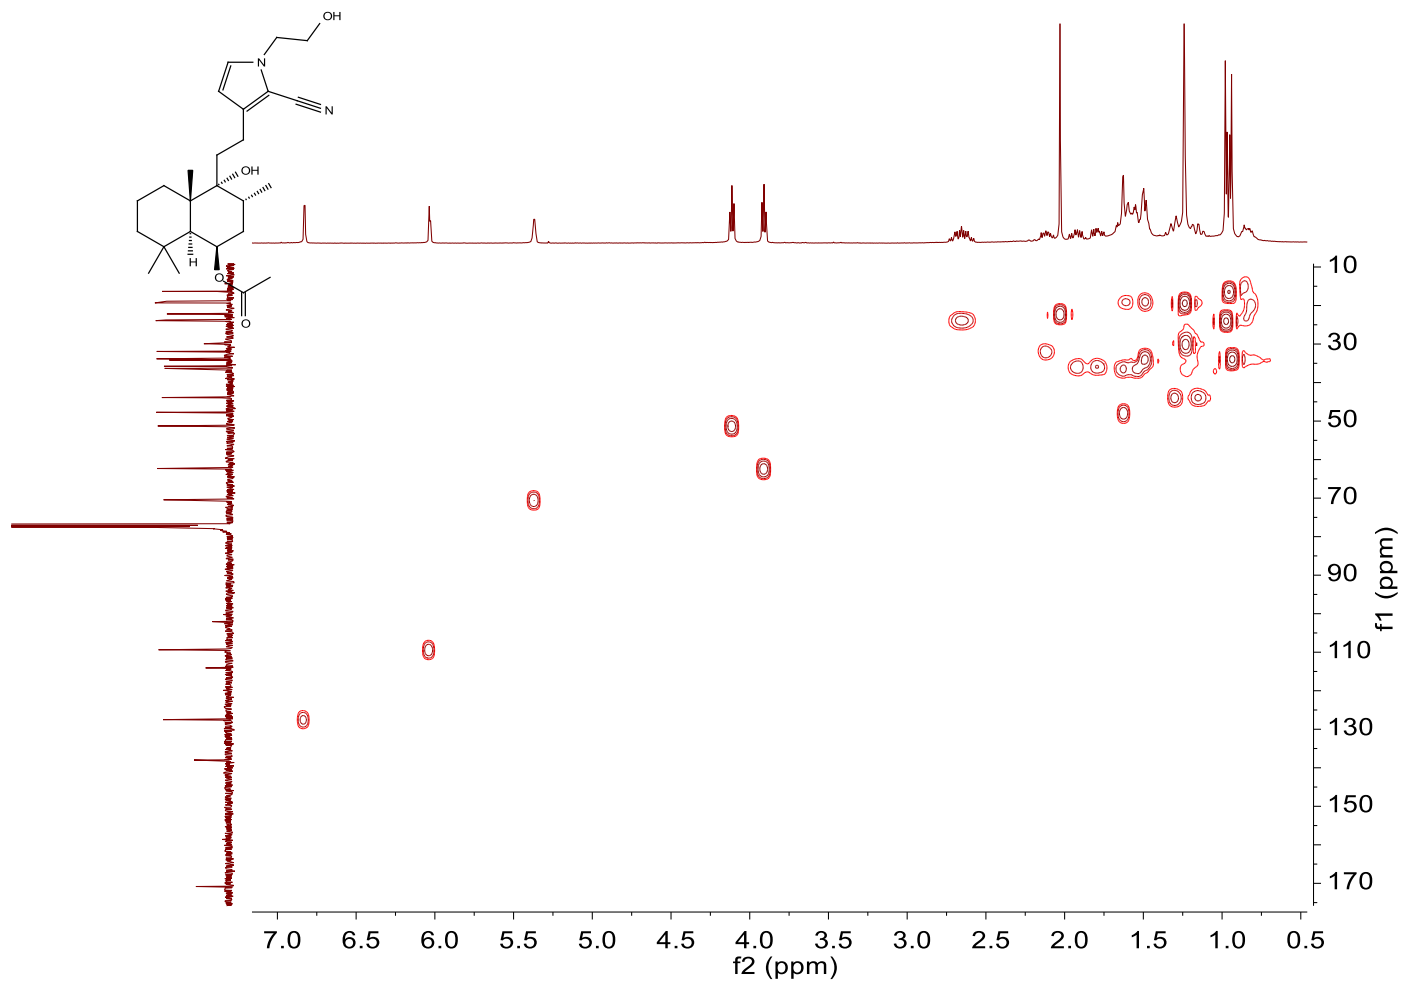

**Figure S31.** The HSQC Spectrum of Compound **4** in CDCl<sub>3</sub>

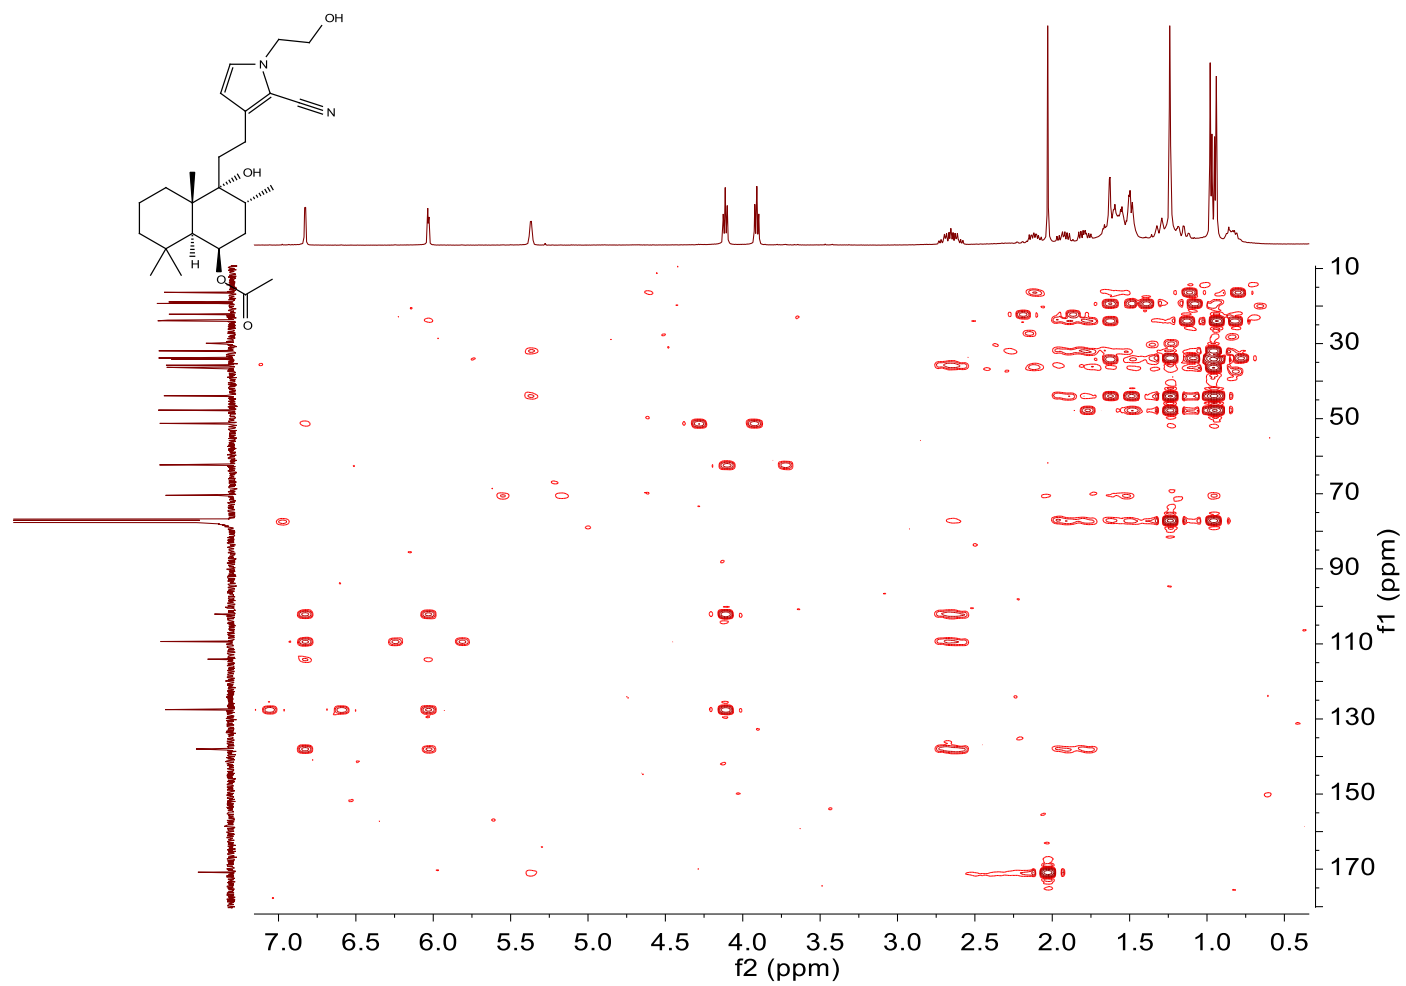

**Figure S32.** The HMBC Spectrum of Compound **4** in  $\text{CDCl}_3$

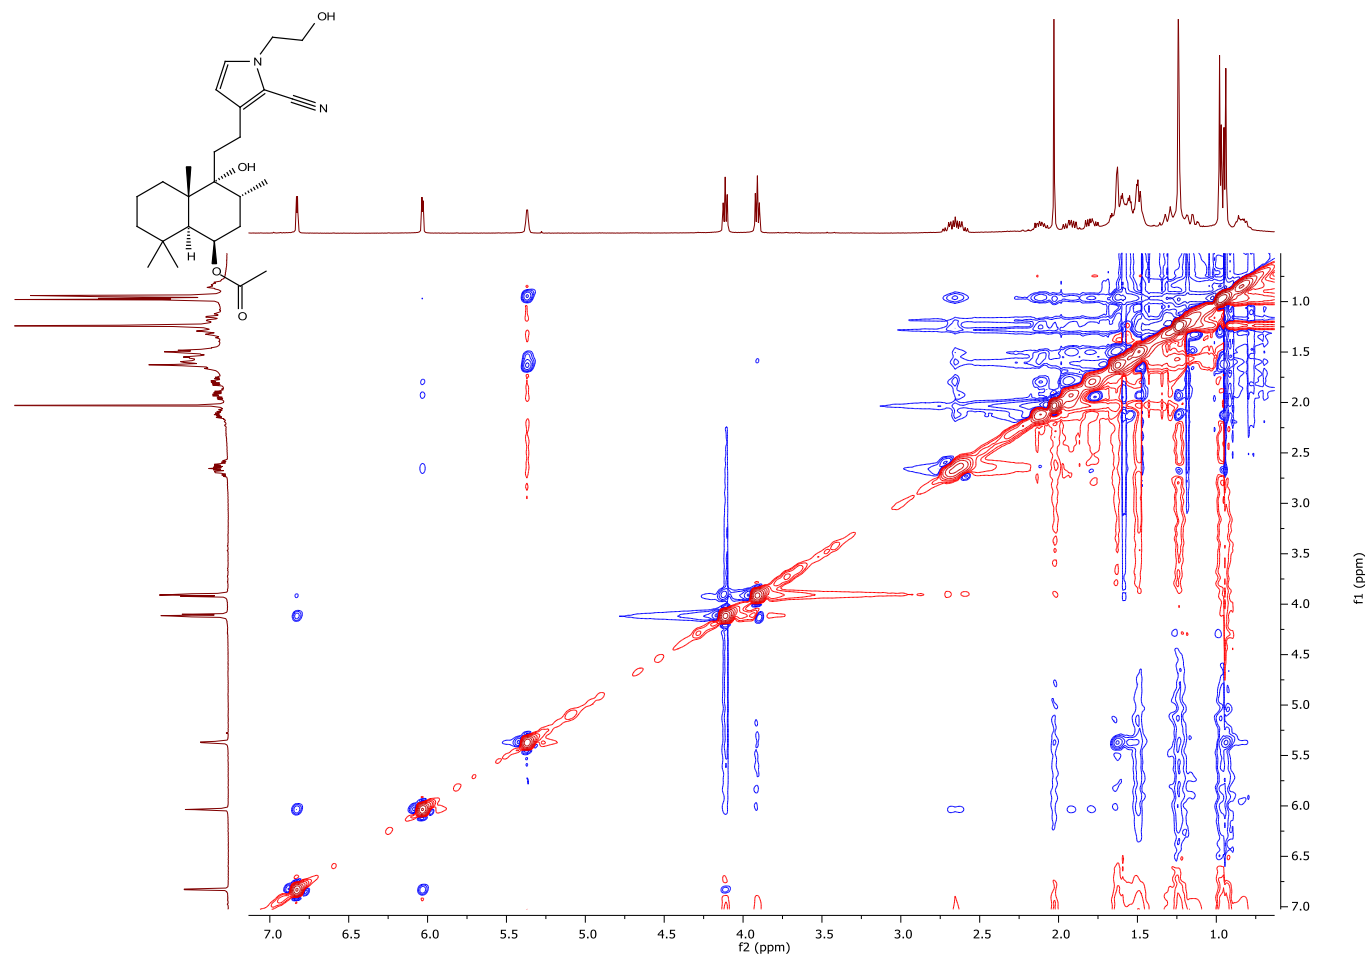

**Figure S33.** The NOESY Spectrum of Compound 4 in CDCl<sub>3</sub>

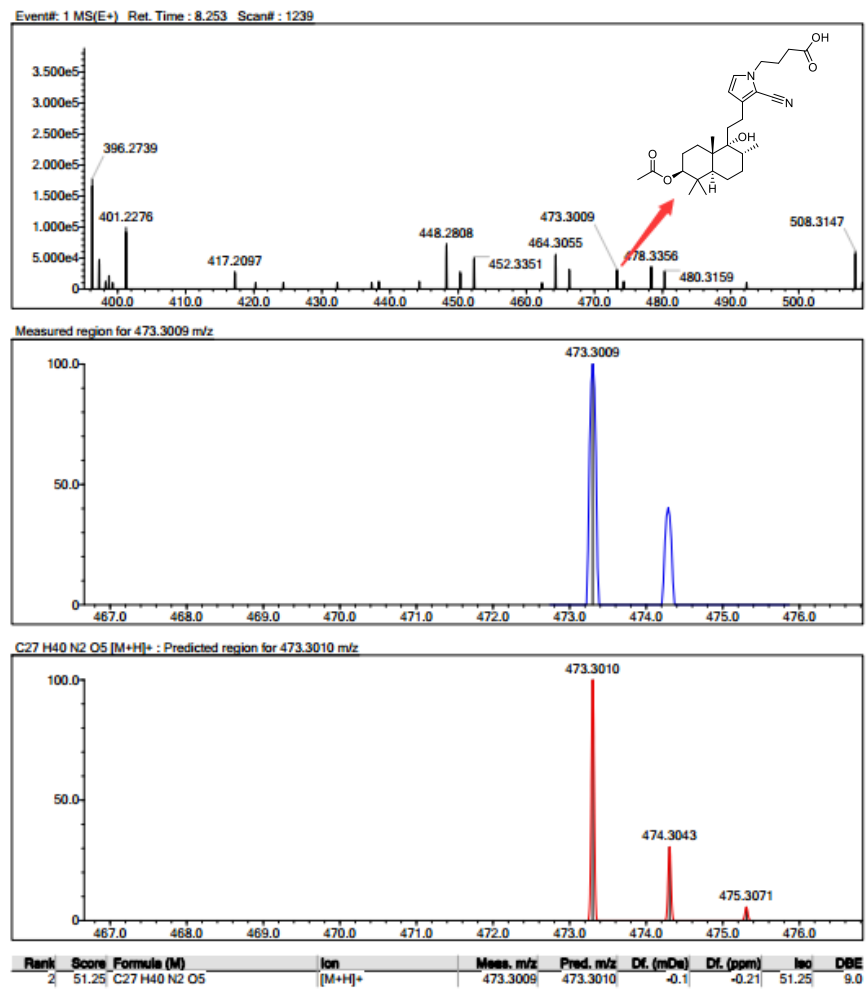

Figure S34. LC-HRESIMS for methanol extract of *Vitex trifolia*

Table S1. Cytotoxicity of Compounds **1–4**<sup>a</sup>

| compound               | IC <sub>50</sub> (μM) ± SD |         |
|------------------------|----------------------------|---------|
|                        | CNE1                       | CNE2    |
| <b>1</b>               | 8.7± 0.9                   | >10     |
| <b>2</b>               | >50                        | >50     |
| <b>3</b>               | >50                        | >50     |
| <b>4</b>               | >50                        | >50     |
| cisplatin <sup>b</sup> | 4.6±0.1                    | 8.5±0.1 |

<sup>a</sup> Cytotoxicity was expressed as the mean values of three experiments ± SD;

<sup>b</sup> Cisplatin was tested as positive control
